# Supplementary material for: Study protocol for a multi-institutional, randomised, double-blinded, placebo-controlled phase III trial investigating additive efficacy of duloxetine for neuropathic cancer pain refractory to opioids and gabapentinoids: the DIRECT study
Source: PubMed Central journal article supplement — BMJ Open. 2017 Aug 28;7(8):e017280. doi: 10.1136/bmjopen-2017-017280 (PMC5724096; doi:10.1136/bmjopen-2017-017280), 2017-08-28
Supplement: bmjopen-2017-017280.draft_revisions.pdf [file bmjopen-2017-017280.draft_revisions.pdf]

# BMJ Open

BMJ Open is committed to open peer review. As part of this commitment we make the peer review history of every article we publish publicly available.

When an article is published we post the peer reviewers' comments and the authors' responses online. We also post the versions of the paper that were used during peer review. These are the versions that the peer review comments apply to.

The versions of the paper that follow are the versions that were submitted during the peer review process. They are not the versions of record or the final published versions. They should not be cited or distributed as the published version of this manuscript.

BMJ Open is an open access journal and the full, final, typeset and author-corrected version of record of the manuscript is available on our site with no access controls, subscription charges or pay-per-view fees (<http://bmjopen.bmj.com>).

If you have any questions on BMJ Open's open peer review process please email [editorial.bmjopen@bmj.com](mailto:editorial.bmjopen@bmj.com)

# BMJ Open

## Study protocol for a multi-institutional, randomised, double-blinded, placebo-controlled phase III trial investigating additive efficacy of duloxetine for neuropathic cancer pain refractory to opioids and gabapentinoids: the DIRECT study

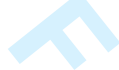

|                                 |                                                                                                                                                                                                                                                                                                                                                                                                                                                                                                                                                                                                                                                                                                                                                                                                                                                                                                                                                                                                                                                                                                                                                                          |
|---------------------------------|--------------------------------------------------------------------------------------------------------------------------------------------------------------------------------------------------------------------------------------------------------------------------------------------------------------------------------------------------------------------------------------------------------------------------------------------------------------------------------------------------------------------------------------------------------------------------------------------------------------------------------------------------------------------------------------------------------------------------------------------------------------------------------------------------------------------------------------------------------------------------------------------------------------------------------------------------------------------------------------------------------------------------------------------------------------------------------------------------------------------------------------------------------------------------|
| Journal:                        | <i>BMJ Open</i>                                                                                                                                                                                                                                                                                                                                                                                                                                                                                                                                                                                                                                                                                                                                                                                                                                                                                                                                                                                                                                                                                                                                                          |
| Manuscript ID                   | bmjopen-2017-017280                                                                                                                                                                                                                                                                                                                                                                                                                                                                                                                                                                                                                                                                                                                                                                                                                                                                                                                                                                                                                                                                                                                                                      |
| Article Type:                   | Protocol                                                                                                                                                                                                                                                                                                                                                                                                                                                                                                                                                                                                                                                                                                                                                                                                                                                                                                                                                                                                                                                                                                                                                                 |
| Date Submitted by the Author:   | 30-Apr-2017                                                                                                                                                                                                                                                                                                                                                                                                                                                                                                                                                                                                                                                                                                                                                                                                                                                                                                                                                                                                                                                                                                                                                              |
| Complete List of Authors:       | Matsuoka, Hiromichi; Kindai University Faculty of Medicine,, Department of Psychosomatic Medicine<br>Ishiki, Hiroto; National Cancer Center Hospital, Department of Palliative Medicine<br>Iwase, Satoru; Institute of Medical Science, The University of Tokyo,, Department of Palliative Medicine<br>Koyama, Atsuko; Kindai University Faculty of Medicine,, Department of Psychosomatic Medicine<br>Kawaguchi, Takashi; Tokyo University of Pharmacy and Life Sciences, Department of Practical Pharmacy<br>Kizawa, Yoshiyuki; Kobe University Graduate School of Medicine, Department of Palliative Medicine<br>Morita, Tatsuya; Seirei Mikatahara General Hospital, Palliative and Supportive Care Division<br>Matsuda, Yoshinobu; National Hospital Organization Kinki-Chuo Chest Medical Center, Department of Psychosomatic Internal Medicine<br>Miyaji, Tempei; Graduate School of Medicine, The, Department of Clinical Trial Data Management<br>Ariyoshi, Keisuke; Institute of Medical Science, The University of Tokyo,, Department of Palliative Medicine<br>Yamaguchi, Takuhiro; Tohoku University Graduate School of Medicine, Division of Biostatistics |
| <b>Primary Subject Heading</b>: | Palliative care                                                                                                                                                                                                                                                                                                                                                                                                                                                                                                                                                                                                                                                                                                                                                                                                                                                                                                                                                                                                                                                                                                                                                          |
| Secondary Subject Heading:      | Palliative care                                                                                                                                                                                                                                                                                                                                                                                                                                                                                                                                                                                                                                                                                                                                                                                                                                                                                                                                                                                                                                                                                                                                                          |
| Keywords:                       | Adult palliative care < PALLIATIVE CARE, Cancer pain < ONCOLOGY, PAIN MANAGEMENT                                                                                                                                                                                                                                                                                                                                                                                                                                                                                                                                                                                                                                                                                                                                                                                                                                                                                                                                                                                                                                                                                         |
|                                 |                                                                                                                                                                                                                                                                                                                                                                                                                                                                                                                                                                                                                                                                                                                                                                                                                                                                                                                                                                                                                                                                                                                                                                          |

SCHOLARONE™  
Manuscripts

## STUDY PROTOCOL

### **Study protocol for a multi-institutional, randomised, double-blinded, placebo-controlled phase III trial investigating additive efficacy of duloxetine for neuropathic cancer pain refractory to opioids and gabapentinoids: the DIRECT study**

Hiromichi Matsuoka<sup>1,2</sup>, Hiroto Ishiki<sup>3</sup>, Satoru Iwase<sup>4</sup>, Atsuko Koyama<sup>1,2</sup>, Takashi Kawaguchi<sup>5</sup>, Yoshiyuki Kizawa<sup>6</sup>, Tatsuya Morita<sup>7</sup>, Yoshinobu Matsuda<sup>8</sup>, Tempei Miyaji<sup>9</sup>, Keisuke Ariyoshi<sup>4,10</sup>, Takuhiro Yamaguchi<sup>9,11</sup>

<sup>1</sup> Palliative Care Center, Cancer Center, Kindai University Hospital, Osaka, Japan

<sup>2</sup> Department of Psychosomatic Medicine, Kindai University Faculty of Medicine, Osaka, Japan

<sup>3</sup> Department of Palliative Medicine, National Cancer Center Hospital, Tokyo, Japan.

<sup>4</sup> Department of Palliative Medicine, Institute of Medical Science, The University of Tokyo, Tokyo, Japan

<sup>5</sup> Department of Practical Pharmacy, Tokyo University of Pharmacy and Life Sciences, Tokyo, Japan

<sup>6</sup> Department of Palliative Medicine, Kobe University Graduate School of Medicine, Kobe, Japan

<sup>7</sup> Palliative and Supportive Care Division, Seirei Mikatahara General Hospital, Hamamatsu, Japan

<sup>8</sup> Department of Psychosomatic Internal Medicine, National Hospital Organization Kinki-Chuo Chest Medical Center, Sakai, Japan

<sup>9</sup> Department of Clinical Trial Data Management, Graduate School of Medicine, The University of Tokyo, Tokyo, Japan

<sup>10</sup> Japanese Organization for Research and Treatment of Cancer (JORTC), NPO, Tokyo, Japan

<sup>11</sup> Division of Biostatistics, Tohoku University Graduate School of Medicine, Sendai, Japan

Corresponding Author: Hiromichi Matsuoka

377-2 Ohno-higashi, Osakasayama City, Osaka, 589-8511

TEL: +81-72-366-0221

1  
2  
3 FAX: +81-72-365-3417

4 E-mail:matsuoka\_h@med.kindai.ac.jp  
5  
6  
7  
8  
9  
10  
11  
12  
13  
14  
15  
16  
17  
18  
19  
20  
21  
22  
23  
24  
25  
26  
27  
28  
29  
30  
31  
32  
33  
34  
35  
36  
37  
38  
39  
40  
41  
42  
43  
44  
45  
46  
47  
48  
49  
50  
51  
52  
53  
54  
55  
56  
57  
58  
59  
60

For peer review only

## Abstract

**Introduction:** Management of cancer patients suffering from neuropathic pain refractory to opioids and gabapentinoids remains an important challenge. Duloxetine is one of the choices after first-line treatment fails. The efficacy of duloxetine has been reported in non-cancer patients and in chemotherapy-induced peripheral neuropathy, but no randomised clinical trials have examined its effects on neuropathic cancer pain refractory to first-line treatment. The objective of this study is to assess the analgesic efficacy of duloxetine in patients suffering from neuropathic cancer pain refractory to opioids and gabapentinoids.

**Methods and analysis:** A multi-institutional, prospective, randomised, double-blind, placebo-controlled, two-parallel trial is planned. The inclusion criteria are adult cancer patients suffering from neuropathic cancer pain refractory to opioids and gabapentinoids, patients with a numerical rating scale (NRS) pain score of 4 or higher, and patients with a total Hospital Anxiety and Depression Scale (HADS) score of less than 20. Patients with chemotherapy-induced peripheral neuropathy are excluded. The study will take place at 14 sites across Japan. Participants will be randomised (1:1 allocation ratio) to a duloxetine intervention group or a placebo control group. Evaluations will be made at baseline (T0 randomisation), day 0 (T1), day 3 (T2), and day 10 (T3). The primary endpoint is defined as the difference in NRS score for pain intensity (average over the previous 24 hours) at T3 between the duloxetine and placebo groups. A sample size of 70 patients will be examined between July 2015 and March 2018.

**Ethics and Dissemination:** Ethics approval was obtained at all participating sites.

The results of this study will be submitted for publication in international peer-reviewed journals and the key findings presented at international scientific conferences.

**Trial registration number:** UMIN000017647 Date of registration: 22 July 2015.

Protocol version: 2.2, 26 April 2017.

1  
2  
3  
4  
5 **Keywords** Duloxetine, Randomised controlled trial, Neuropathic cancer pain, Palliative care.  
6  
7  
8  
9  
10  
11  
12  
13  
14  
15  
16  
17  
18  
19  
20  
21  
22  
23  
24  
25  
26  
27  
28  
29  
30  
31  
32  
33  
34  
35  
36  
37  
38  
39  
40  
41  
42  
43  
44  
45  
46  
47  
48  
49  
50  
51  
52  
53  
54  
55  
56  
57  
58  
59  
60

For peer review only

### Strengths and limitation of this study

- This is the first study to assess the analgesic efficacy of duloxetine in patients suffering from neuropathic cancer pain refractory to opioids and gabapentinoids, and the results of the trial will clarify the second-line standard treatment for cancer-related neuropathic cancer pain.
- This is an adequately powered study to provide a clinically meaningful outcome, and adverse effects following interventions will be systematically evaluated.
- We excluded patients with depression from the study population for accurate evaluation of the pharmacological effects of duloxetine on pain.
- This study include the heterogeneity of causes of neuropathic cancer pain.
- The primary endpoint is not worst pain intensity in the last 24 hours but the difference in average pain intensity score at T3 (day 10) between two groups.

## Introduction

Pain is a symptom that is experienced by many patients with cancer. Prevalence at the time of diagnosis is 30%, and this increases to 90% in advanced stages [1,2]. Pain in cancer patients is often classified as nociceptive pain or neuropathic pain, but both types are thought to be intermixed. Of patients with cancer-related pain, 33% have neuropathic pain (NP) [1]. In general, NP is often resistant to treatment, whereas nociceptive pain tends to respond well to treatment [2-5].

The efficacy of many drugs for NP has been reported in non-cancer patients, and some have been shown to be effective for NP in cancer patients [6]. These drugs include opioids, tricyclic antidepressants (TCAs), and gabapentinoids (gabapentin and pregabalin) [7-11]. In cancer patients, the efficacy of TCAs and gabapentinoids has been proven in clinical trials [12, 13], and a phase III study revealed moderate analgesic effects of gabapentin in combination with opioids [14]. However, it is unclear which drug is most effective in cases in which first-line treatment with gabapentinoids fails to alleviate NP in cancer patients.

In treatment of non-cancer NP, the efficacy of addition of duloxetine to pregabalin has been shown in a phase III study [15]. There is, however, no empirical data for second-line treatment of NP in cancer patients. The National Comprehensive Cancer Network (NCCN) guidelines list duloxetine as a potential choice for second-line treatment [8], and a phase III study showed the efficacy of duloxetine in treatment of chemotherapy-induced peripheral neuropathy (CIPN) in cancer patients [16]. Furthermore, a small retrospective study reported the beneficial effects of duloxetine in palliation of NP refractory to pregabalin and opioids in 15 cancer patients [17]. In the double-blind randomised placebo-controlled study described here, we will evaluate the efficacy of addition of duloxetine for neuropathic cancer pain refractory to opioids and gabapentinoids. Currently there is no specific standard treatment for neuropathic pain in cancer patients, placebo is used instead of active control. The results of



1  
2  
3 the trial will clarify the second-line standard treatment for cancer-related NP.  
4  
5  
6

## 7 **Methods and analysis**

### 8 Study design

9  
10 The SPIRIT (Standard Protocol Items for Randomised Trials) statement and its checklist were  
11 followed in preparing the protocol. The study design is summarized in Figure 1. A  
12  
13  
14  
15  
16  
17  
18  
19  
20  
21  
22  
23  
24  
25  
26  
27  
28  
29  
30  
31  
32  
33  
34  
35  
36  
37  
38  
39  
40  
41  
42  
43  
44  
45  
46  
47  
48  
49  
50  
51  
52  
53  
54  
55  
56  
57  
58  
59  
60  
The SPIRIT (Standard Protocol Items for Randomised Trials) statement and its checklist were followed in preparing the protocol. The study design is summarized in Figure 1. A multicentre, prospective, randomised, placebo-controlled, double-blinded, two-parallel group study will be performed to compare the efficacy of addition of duloxetine (intervention group) with the efficacy of addition of a placebo (control group).

### 25 Study Settings and Participants

27 Recruiting will be performed in 14 adult palliative care sites across Japan, with  
28 involvement of 10 palliative care teams and 4 palliative care units. The inclusion and  
29 exclusion criteria are summarized in box 1. The main inclusion criterion is patients suffering  
30 from cancer pain (neuropathic or mixed) refractory to opioids and gabapentinoids. Diagnosis  
31 of NP is based on the International Association for the Study of Pain (IASP) algorithm, in  
32 which a diagnosis of NP is made for patients with (1) pain with a distinct neuroanatomically  
33 plausible distribution; (2) a history suggestive of a relevant lesion or disease affecting the  
34 peripheral or central somatosensory system; (3) a range of pain that is neuroanatomically  
35 plausible and symptoms suggesting somatosensory injury or neurological disease (i.e.,  
36 hyperalgesia, hypoalgesia, dysesthesia, or allodynia along the dermatome); and (4) relevant  
37 objective or imaging findings suggesting nervous system injury or disease (i.e., imaging  
38 findings showing that a lesion is present). Based on these criteria, the certainty of the  
39 presence of NP is grades as definite NP (1 to 4 present) and probable NP (1 and 2, plus 3 or 4)  
40 [18]. Definite and probable NP will be considered to indicate NP and patients with these

1  
2  
3 conditions will be eligible as subjects. Patients with an average numerical rating scale (NRS)  
4  
5 pain score in the preceding 24-hour period of 4 or higher [19] and those with total Hospital  
6  
7 Anxiety and Depression Scale (HADS) scores of less than 20 will be included, based on  
8  
9 criteria for pain intensity used in similar studies on NP [20]. The exclusion criteria are  
10  
11 patients with progressive paralysis, a known contraindication to use of duloxetine, or  
12  
13 depression. To examine the effects of duloxetine, we believe it is necessary to exclude  
14  
15 patients with depression because duloxetine may alleviate pain through improving depression.  
16  
17 Patients with CIPN or impaired cognitive function will also be excluded.  
18  
19

### 20 21 22 23 Recruitment, randomisation, masking, and follow-up

#### 24 25 Recruitment

26  
27 Eligible patients satisfying the screening inclusion and exclusion criteria will be invited to  
28  
29 participate in the study by site investigators.  
30  
31

#### 32 33 34 Randomisation

35  
36 Physicians will introduce the trial to patients. Upon enrollment and after providing informed  
37  
38 consent, patients will be randomly allocated to intervention (duloxetine) or control (placebo)  
39  
40 groups in a web-based central randomisation system using minimisation methods and a  
41  
42 computer-generated randomisation schedule with a 1:1 allocation ratio. In performing this  
43  
44 allocation, we will minimise the following adjustment factors to avoid a large bias: (1)  
45  
46 average pain intensity measured by the NRS in the last 24 h ( $\leq 7$ ,  $\geq 8$ ), (2) type of pain (spinal  
47  
48 cord infiltration or others), (3) HADS total score ( $\leq 10$ ,  $\geq 11$ ), (4) treatment setting (inpatient  
49  
50 or outpatient), (5) response to gabapentinoids (non-responsive or intolerance due to side  
51  
52 effects), and (6) study site.  
53  
54  
55  
56  
57  
58  
59  
60

## Masking

Patients and clinicians responsible for treatment will be blinded to administration of duloxetine or placebo. Only a clinical trial pharmacist who generate capsules, but is not involved in patient care, will know the allocation and outcomes. All study drugs will be packaged by this pharmacist. Duloxetine (Cymbalta®) will be administered with a change in dosage form: the capsules will be covered with a No. 3 capsule of the same material to make an overcapsule.

## Data management, central monitoring, and audit

Evaluations will be performed at four time points: baseline (time of randomisation, T0), the day before the start of treatment (day 0, T1), and 3 days (day 3, T2) and 10 days (day 10, T3) after initiation of treatment. The timing and details of evaluations are given in Table 1.

Once a patient is enrolled or randomised, the study site will make every reasonable effort to follow the patient for the entire study period. Patients will not be allowed to cross over from one group to another group until the end of the study (T3), however, they can choose to leave the study for any reasons at any time without detriment to the provision or quality of their clinical care. The investigators at each study sites will maintain individual records for each patient as source data, which include a copy of informed consent, medical records, laboratory data and other records or notes. All data will be collected by the independent data management centre. The data management centre will oversee the intra-study data sharing process. The clinical data entry, data management and central monitoring will be performed using the electric data capture VIEDOC 3 (PCG Solutions, Sweden). An interim analysis will not be performed. Also auditing is not planned in this study.

## Harms

1  
2  
3 Investigators must record all adverse events (AEs) in the medical records and web systems.  
4  
5 The National Cancer Institute's CTCAE (Ver.4.0) will be used to grade each adverse event  
6  
7 (AE). All AEs are to be followed up continually during their course up. All severe adverse  
8  
9 events (SAEs) must be reported to Institutional Review Board (IRB) and investigators in all  
10  
11 sites, and discussed through a FAX. Patients that are enrolled into the study will be treated by  
12  
13 health care services provided by health insurance.  
14  
15

### 16 17 18 Measurement tools

#### 19 20 Numerical Rating Scale (NRS)

21  
22 The 11-point NRS will be used to measure pain intensity from 0 (no pain) to 10 (worst  
23  
24 possible pain), based on average pain in the past 24 hours [21].  
25  
26  
27

#### 28 29 Pain Relief Scale

30  
31 A self-assessment will be performed by the patients using the Pain Relief Scale. Patients  
32  
33 will determine for themselves the efficacy of analgesics using a four-point scale of complete  
34  
35 relief, a lot of relief, slight relief, and no change.  
36  
37  
38

#### 39 40 Short-Form McGill Pain Questionnaire 2 (SF-MPQ-2, Japanese version)

41  
42 The SF-MPQ-2 will be used to examine differences in effects due to pain mechanisms. The  
43  
44 reliability and validity of the Japanese version have been verified [22].  
45  
46  
47

#### 48 49 European Organization for Research and Treatment of Cancer (EORTC) QLQ-C15-PAL

50  
51 EORTC QLQ-C15-PAL will be used for evaluation of patient QOL. The reliability and  
52  
53 validity of the Japanese version have been confirmed [23].  
54  
55  
56  
57  
58  
59  
60

### Hospital Anxiety and Depression Scale (HADS)

The HADS will be used for measurement of psychiatric symptoms (anxiety and depression) of patients with a physical disease. HADS is a screening tool that allows assessment based on a small number of items. Its reliability and validity have been verified internationally [24, 25]. A HADS score <20 points as a cutoff for exclusion of cancer patients with severe depression will be used, based on a previous report [25].

### Pain Catastrophizing Scale (PCS)

The severity of cancer-related pain is influenced by engagement of patients in catastrophic thinking, such as "my pain will undoubtedly never improve" [26]. This effect will be measured using the Japanese version of the PCS, for which the validity and reliability have been shown [27].

### Common Terminology Criteria for Adverse Events (CTCAE)

The worst grade of an adverse event during the preceding period will be assessed using the CTCAE v.4.0, Japanese Clinical Oncology Group (JCOG) version. Five adverse events of somnolence, dizziness, nausea, palpitations, and hypertension will be investigated if they occur at a relatively high frequency. Other adverse events may also be assessed.

### Performance Status (PS)

The European Cooperative Oncology Group (ECOG) PS system will be used for evaluation of PS by primary physicians [28].

## Treatment

### Pre-intervention treatment

1  
2  
3 Opioids (morphine, oxycodone, fentanyl, tapentadol) will be given to all patients. If AEs  
4 of gabapentinoids are severe, they will be discontinued or reduced in dose, but if the adverse  
5 effects are tolerable but the therapeutic effect is insufficient, gabapentinoids will be  
6 administered concomitantly with duloxetine. Pregabalin and gabapentin will be used in the  
7 study at the established effective doses of 300 mg and 1800 mg, respectively [14, 29].  
8  
9  
10  
11  
12  
13

## 14 15 16 Interventions

17  
18 Duloxetine or placebo will be administered for 10 days. Duloxetine (20 mg/day, one  
19 capsule) will be taken orally by participants in the intervention group starting after breakfast  
20 on Day 1. To determine if titration is necessary, pain relief will be evaluated using the Pain  
21 Relief Scale on Day 3 (T2). Changes in symptoms, adverse events, and medication  
22 compliance will be evaluated. Patients who have "complete relief" or "a lot of relief" of pain  
23 will continue to receive doses of 20 mg/day from Day 4. In all other cases, the dose will be  
24 increased to 40 mg/day (two capsules) from Day 4. If an intolerable AE such as nausea  
25 occurs at 40 mg/day, the dose will be reduced as required. If an intolerable AE occurs at 20  
26 mg/day, the protocol will be discontinued. AEs that may be caused by duloxetine, such as  
27 somnolence, dizziness, nausea, palpitations, and hypertension, will be evaluated to determine  
28 whether duloxetine treatment should be interrupted.  
29  
30  
31  
32  
33  
34  
35  
36  
37  
38  
39  
40  
41  
42

43 Placebo (22.4 mg lactose in a No. 4 capsule) will be administered to participants in the  
44 control group by oral administration (one capsule/day) starting after breakfast on Day 1. To  
45 determine if titration is necessary, pain relief will be evaluated using the Pain Relief Scale on  
46 Day 3 (T2), and changes in symptoms, AEs, and medication compliance will be examined.  
47 Patients with "complete relief" or "a lot of relief" of pain will continue to receive one  
48 capsule/day from Day 4. In all other cases, the dose will be increased to 2 capsules/day from  
49 Day 4. If an intolerable AE such as nausea occurs at 2 capsules/day, the dose will be reduced  
50  
51  
52  
53  
54  
55  
56  
57  
58  
59  
60

1  
2  
3 as side effects dictate. If there is an intolerable AE at one capsule/day, the protocol will be  
4 discontinued. To improve adherence to intervention protocols, participants will return the  
5 unused tablets at the last visit, and unused tablets will be counted and recorded on the  
6 medical records. Currently there is no specific standard treatment for neuropathic pain in  
7 cancer patients, placebo is used instead of active control.  
8  
9  
10  
11  
12

### 13 14 15 16 Cotreatments

17  
18 Concomitantly administered analgesics such as opioids, non-steroidal anti-inflammatory  
19 drugs (NSAIDs), acetaminophen, or other adjuvant analgesics such as anticonvulsants,  
20 antidepressants, antiarrhythmics, N-methyl-D-aspartate (NMDA) receptor antagonists, and  
21 steroids will not be changed during the follow-up period. In principle, new analgesics will not  
22 be started. When nausea occurs during the period of duloxetine administration, use of an  
23 antiemetic will be permitted. Currently used immediate-release opioids will be used in cases  
24 of breakthrough pain. Immediate-release rescue opioids will be freely permitted without  
25 limitation on the number of doses.  
26  
27  
28  
29  
30  
31  
32  
33  
34  
35  
36  
37

### 38 Study endpoints

#### 39 40 Primary endpoint

41  
42 The primary endpoint is a comparison of pain intensity (average pain over the previous 24  
43 hours) at T3 (Day 10) measured using the NRS in the duloxetine and placebo groups.  
44  
45  
46  
47  
48

#### 49 50 Secondary endpoints

51  
52 Efficacy will also be assessed using seven secondary endpoints: the nature of pain using  
53 the SF-MPQ-2, EORTC QLQ-C15-PAL scores, daily opioid dose, changes in HADS score,  
54 degree of catastrophic thinking on the PCS, adverse events (CTCAE v.4.0-JCOG), and the  
55  
56  
57  
58  
59  
60

1  
2  
3 difference in NRS scores for pain intensity (average over the previous 24 hours) measured at  
4  
5 T3 in subgroups of patients who are unresponsive or intolerant to gabapentinoids. Subgroup  
6  
7 analyses will be performed on two patients groups; patients unresponsive to gabapentinoids  
8  
9 and patients intolerant to gabapentinoids.  
10

### 11 12 13 14 Statistical considerations

#### 15 16 Statistical hypothesis

17  
18 Comparison of the primary endpoint of the NRS score for pain at Day 10 (T3) (average pain  
19  
20 over the previous 24-hour period) between the duloxetine and placebo groups will be  
21  
22 conducted using a one-sided t-test at a significance level of 5% according to the  
23  
24 intention-to-treat (ITT) principle. Point estimates and 90% confidence intervals for the  
25  
26 difference between two group means will be calculated.  
27  
28

29  
30 The secondary endpoints of efficacy (SF-MPQ-2, EORTC QLQ-C15-PAL, HADS, PCS,  
31  
32 daily opioid dose, and group comparison of average pain on the NRS in the previous 24 hours  
33  
34 in patients who are unresponsive or intolerant to gabapentinoids) will be evaluated similarly  
35  
36 to the primary endpoint. The distribution of grades of adverse events (CTCAE v.4.0-JCOG)  
37  
38 and the incidence of adverse events of Grade 3 or higher and of Grade 4 or higher will be  
39  
40 determined. A Mantel test will be performed for group comparison.  
41  
42  
43  
44

#### 45 46 Sample size calculation

47  
48 The difference between group mean NRS scores for pain in the previous 24 hours on Day  
49  
50 10 (T3) is assumed to be one point and the standard deviation of the NRS is taken to be 1.5  
51  
52 points. Assuming a rate of exclusion of 10 percent, 35 subjects are needed in each group  
53  
54 (70 subjects in total) to achieve a statistical power of 80% with a one-sided significance level  
55  
56 of 5%.  
57  
58  
59  
60



### Ethical issues

All patients will be required to provide written informed consent. The study will be performed in accordance with the Declaration of Helsinki and the Japanese ethical guidelines for clinical research. The protocol was approved by the Institutional Review Board at each study site. This trial has been registered at the UMIN Clinical Trials Registry as UMIN000017647. Modifications in the study protocol will be communicated to the Institutional Review Board at each study site as well as the Independent Data Monitoring Committee. Each Ethics Committee or Institutional Review Board will revise informed consent materials given to participants and adapt according to their own institution's guidelines.

### **Discussion**

To our knowledge, there has been no randomised study of the analgesic efficacy of duloxetine in patients with neuropathic cancer pain refractory to opioids and gabapentinoids. In our planned trial, we will use a randomised, double-blind, placebo-controlled design, which is the most appropriate design to demonstrate the efficacy of a new therapy. Our findings using this approach may also allow international recommendations to be updated. We also considered a crossover design, but a parallel design was finally chosen, given that the crossover design has several limitations [30]. The crossover design is suitable for patients in a stable condition, but this is not the situation for cancer patients with neuropathic pain (NP) refractory to opioids and gabapentinoids. We also believe that the treatment might have carryover effects and alter the response to subsequent treatments, and that patients may not be in a comparable condition at the start of each treatment period in a crossover trial.

Several issues related to the content of the trial require discussion. There are three major

1  
2  
3 concerns: (i) the heterogeneity of causes of NP, (ii) the choice of the primary endpoint, and  
4  
5 (iii) the role of depression. To address the heterogeneous causes of NP, we excluded patients  
6  
7 with CIPN, but the trial might still be criticized due to combination of peripheral and central  
8  
9 NP in one study. Narrower criteria are theoretically possible, but accrual of patients who meet  
10  
11 these criteria is likely to be difficult. We thus decided to include both peripheral and central  
12  
13 NP in the study, and subgroup analyses will be performed. Second, the primary endpoint is  
14  
15 the difference in average pain intensity score at T3 (day 10) between two groups. Although  
16  
17 we had acknowledged that some authors recommend worst pain intensity in the last 24 hours  
18  
19 as primary end-points because it satisfies most key recommendations in the draft guidance by  
20  
21 the FDA [31], average pain intensity is adopted by many clinical trials about NP [32],  
22  
23 including only one placebo-controlled RCT in cancer patients with NP [14]. Furthermore, to  
24  
25 evaluate chronic pain, especially taking into account the nature of NP in this setting, we  
26  
27 concluded that it is better to use the “average pain intensity in the last 24 hours” as the  
28  
29 primary endpoint after discussion among the members of the steering committee. Finally,  
30  
31 since depression affects the assessment of pain, we excluded patients with depression from  
32  
33 the study population for accurate evaluation of the pharmacological effects of duloxetine on  
34  
35 pain. Therefore, the planned placebo-controlled double-blind multicentre RCT will be the  
36  
37 first to evaluate the efficacy of pharmacological treatment on well-defined NP in patients  
38  
39 with cancer.  
40  
41  
42  
43  
44  
45

#### **Trial status**

46  
47  
48 At the time of manuscript submission (April 2017), the status of the trial is 'ongoing'.  
49  
50  
51  
52

#### **Confidentially**

53  
54  
55 Data will be retained in accordance with the Japanese ethical guidelines for clinical research.  
56  
57  
58  
59  
60

1  
2  
3 Participants will be allocated a unique identification (ID) number at entry. The master list  
4  
5 linking participant personal information and ID number will be maintained in a separate  
6  
7 locked cabinet and password-protected hard drive at each institution. Data will be analysed by  
8  
9 ID number only. Records will be retained for 5 years after study completion and then  
10  
11 destroyed by the data center.  
12

### 13 14 15 16 **Dissemination**

17  
18 The results of this study will be submitted for publication in international peer-reviewed  
19  
20 journals and the key findings presented at conferences. Participants will be informed of the  
21  
22 results of the trial by the investigators. Authorship will be ascribed in accordance with the  
23  
24 International Committee of Medical Journal Editors guidance.  
25  
26

### 27 28 29 **Data Sharing Statement**

30  
31 The data obtained in this study can only be accessed if approved by Japanese Organisation for  
32  
33 Research and Treatment of Cancer (JORTC) Protocol Review Committee or Independent  
34  
35 Data Monitoring Committee.  
36  
37

### 38 39 40 **Access to data**

41  
42 JORTC Data Center and JORTC Independent Data Monitoring Committee have access to the  
43  
44 final trial dataset. There is no contractual agreement regarding investigators' access  
45  
46 restrictions on dataset.  
47  
48

### 49 50 51 **Declarations**

52  
53 Ethics approval and consent to participate

54  
55 The protocol was approved by the Institutional Review Board at each study site. Informed  
56  
57  
58  
59  
60

1  
2  
3 consent for participation in the trial will be obtained from all patients.  
4  
5

6  
7 **Competing interests**  
8

9 The authors declare that they have no competing interests.  
10  
11

12  
13 **Funding**  
14

15 This work was supported by the following grants: Sasakawa Memorial Health Foundation  
16 Research Grant (Grant No.: 2013-A003), 2014-2016 Grant-in-Aid for Scientific Research  
17 (Grant-in-Aid for Young Scientists B; Grant No.: 26860486), 2014 Health Labour Sciences  
18 Research Grant (Grant for Innovative Clinical Cancer Research: Multicenter Clinical  
19 Research Concerning the Development of Palliative Medicine for Severe Symptoms in  
20 Cancer Patients) Research Team (H26-Innovative Cancer-General-056), and a 2015-2017  
21 Japan Agency for Medical Research and Development (AMED) award (Innovative Clinical  
22 Cancer Research). The entire research organization has no conflicts of interest to declare.  
23  
24  
25  
26  
27  
28  
29  
30  
31  
32  
33  
34  
35

36 **Sponsor detail**  
37

38 Division of Cancer Research Department of Research Promotion  
39

40 Japan Agency for Medical Research and Development  
41

42 22F Yomiuri Shimbun Bldg. 1-7-1 Otemachi, Chiyoda-ku, Tokyo 100-0004 Japan  
43

44 Phone: +81-3-6870-2221  
45

46 Fax: +81-3-6870-2244  
47  
48  
49  
50

51 **Abbreviations**  
52

53 NRS: Numerical Rating Scale; NP: Neuropathic pain; TCA: Tricyclic Antidepressant;  
54  
55 NCCN: National Comprehensive Cancer Network; CIPN: Chemotherapy-Induced Peripheral  
56  
57  
58  
59  
60

1  
2  
3 Neuropathy; IASP: International Association for the Study of Pain; HADS: Hospital Anxiety  
4 and Depression Scale; PS: Performance Status; PRS: Pain Relief Scale; ECOG: European  
5 Cooperative Oncology Group; SF-MPQ: Short-Form McGill Pain Questionnaire; EORTC:  
6 European Organization for Research and Treatment; CTCAE: Common Terminology Criteria  
7 for Adverse Events; JCOG: Japan Clinical Oncology Group; PCS: Pain Catastrophizing  
8 Scale; NSAIDs: Non-Steroidal Anti-Inflammatory Drugs; NMDA: N-methyl-D-aspartate;  
9 JORTC: Japanese Organization for Research and Treatment of Cancer  
10  
11  
12  
13  
14  
15  
16  
17  
18  
19

#### 20 21 Authors' contributions

22  
23 HM, HI, SI, AK, YK, TM, YM, TM, KA, participated in the design of the study.  
24  
25 TY, TK, designed the statistical analysis plan. All authors contributed to writing and revising  
26  
27 the manuscript critically, and all gave their final approval of the version to be published.  
28  
29

#### 30 31 32 Acknowledgements

33  
34 We are grateful for support from the Japan Agency for Medical Research and  
35  
36 Development, Grant-in-Aid for Scientific Research, and the Sasakawa Memorial Health  
37  
38 Foundation. The authors thank in advance all the patients, investigators and institutions  
39  
40 involved in this study.  
41  
42  
43  
44  
45  
46  
47  
48  
49  
50  
51  
52  
53  
54  
55  
56  
57  
58  
59  
60

## References

1. Portenoy RK, Miransky J, Thaler HT, Hornung J, Bianchi C, Cibas-Kong I, et al. Pain in ambulatory patients with lung or colon cancer. Prevalence, characteristics, and effect. *Cancer*. 1992;70:1616-24.
2. Garcia de Paredes ML, del Moral Gonzalez F, Martinez del Prado P, Martí Ciriquián JL, Enrech Francés S, Cobo Dols M, et al. First evidence of oncologic neuropathic pain prevalence after screening 8615 cancer patients. Results of the On study. *Ann Oncol*. 2011;22:924-30.
3. Fainsinger RL, Fairchild A, Nekolaichuk C, Lawlor P, Lowe S, Hanson J. Is pain intensity a predictor of the complexity of cancer pain management? *J Clin Oncol*. 2009;27:585-90.
4. Bennett MI, Rayment C, Hjermstad M, Aass N, Caraceni A, Kaasa S. Prevalence and aetiology of neuropathic pain in cancer patients: a systematic review. *Pain*. 2012;153:359-65.
5. Caraceni A, Hanks G, Kaasa S, Bennett MI, Brunelli C, Chemy N, et al. Use of opioid analgesics in the treatment of cancer pain: evidence-based recommendations from the EAPC. *Lancet Oncol*. 2012;13:e58-68.
6. O'Connor AB, Dworkin RH. Treatment of neuropathic pain: an overview of recent guidelines. *Am J Med*. 2009;122:S22-32.
7. Saarto T, Wiffen PJ. Antidepressants for neuropathic pain. *Cochrane Database Syst Rev*. 2007;17:CD005454.
8. The National Comprehensive Cancer Network.  
<http://www.oralcancerfoundation.org/treatment/pdf/pain.pdf>
9. Dworkin RH, O'Connor AB, Backonja M, Farrar JT, Finnerup NB, Jensen TS, et al. Pharmacologic management of neuropathic pain: Evidence-based recommendations. *Pain*. 2007;132:237-51.

- 1  
2  
3 10. Tan T, Barry P, Reken S, Baker M; Guideline Development Group. Pharmacological  
4 management of neuropathic pain in non-specialist settings: summary of NICE guidance.  
5  
6 BMJ. 2010;340:c1079.  
7  
8
- 9  
10 11. Attal N, Cruccu G, Baron R, Haanpää M, Hansson P, Jensen TS et al. EFNS guidelines on  
11 the pharmacological treatment of neuropathic pain: 2010 revision. Eur J Neurol.  
12  
13 2010;17:1113-e88.  
14  
15
- 16 12. Finnerup NB, Attal N, Haroutounian S, McNicol E, Baron R, Dworkin RH, et al.  
17  
18 Pharmacotherapy for neuropathic pain in adults: a systematic review and meta-analysis.  
19  
20 Lancet Neurol. 2015;14:162-73.  
21  
22
- 23 13. Perry G, Andrew N, Scott M, Russell K. Nonopioid pharmacotherapy. In: Perry G, editor.  
24  
25 The Diagnosis and Treatment of Breakthrough Pain. New York: Oxford University Press;  
26  
27 2008. p. 86-90.  
28  
29
- 30 14. Caraceni A, Zecca E, Bonezzi C, Arcuri E, Yaya Tur R, Maltoni M, et al. Gabapentin for  
31  
32 neuropathic cancer pain: a randomized controlled trial from the Gabapentin Cancer Pain  
33  
34 Study Group. J Clin Oncol. 2004;22:2909-17.  
35  
36
- 37 15. Bouhassira D, Wilhelm S, Schacht A, Perrot S, Kosek E, Cruccu G, et al. Neuropathic  
38  
39 pain phenotyping as a predictor of treatment response in painful diabetic neuropathy: data  
40  
41 from the randomized, double-blind, COMBO-DN study. Pain. 2014;155:2171-9.  
42  
43
- 44 16. Smith EM, Pang H, Cirrincione C, Fleishman S, Paskett ED, Ahles T, et al. Effect of  
45  
46 duloxetine on pain, function, and quality of life among patients with  
47  
48 chemotherapy-induced painful peripheral neuropathy: a randomized clinical trial. JAMA.  
49  
50 2013;309:1359-67.  
51  
52
- 53 17. Matsuoka H, Makimura C, Koyama A, Otsuka M, Okamoto W, Fujisaka Y, et al. Pilot  
54  
55 study of duloxetine for cancer patients with neuropathic pain non-responsive to pregabalin.  
56  
57 Anticancer Res. 2012;32:1805-10.  
58  
59  
60

- 1  
2  
3 18. Treede RD1, Jensen TS, Campbell JN, Cruccu G, Dostrovsky JO, Griffin JW, et al.  
4  
5 Neuropathic pain: redefinition and a grading system for clinical and research purposes.  
6  
7 Neurology. 2008;70:1630-5.  
8
- 9  
10 19. Atkinson TM, Mendoza TR, Sit L, Passik S, Scher HI, Cleeland C, et al. The brief pain  
11  
12 inventory and its “pain at its worst in the last 24 hours” item: clinical trial endpoint  
13  
14 considerations. Pain Med. 2010;11:337-46.  
15
- 16 20. Rao RD, Michalak JC, Sloan JA, Loprinzi CL, Soori GS, Nikcevich DA, et al. Efficacy of  
17  
18 gabapentin in the management of chemotherapy-induced peripheral neuropathy; a phase 3  
19  
20 randomized, double-blind, placebo-controlled, crossover trial (N00C3). Cancer.  
21  
22 2007;110:2110-8.  
23
- 24 21. Caraceni A, Cherny N, Fainsinger R, Kaasa S, Poulain P, Radbruch L, et al. Pain  
25  
26 measurement tools and methods in clinical research in palliative care: recommendations  
27  
28 of an Expert Working Group of the European Association of Palliative Care. J Pain  
29  
30 Symptom Manage. 2002;23:239-55.  
31  
32
- 33 22. Maruo T, Nakae A, Maeda L, Shi K, Takahashi K, Morris S, et al. Validity, reliability,  
34  
35 and assessment sensitivity of the Japanese version of the short-form McGill pain  
36  
37 questionnaire 2 in Japanese patients with neuropathic and non-neuropathic pain. Pain Med.  
38  
39 2014;15:1930-7.  
40  
41
- 42 23. Miyazaki K1, Suzukamo Y, Shimosuma K, Nakayama T. Verification of the  
43  
44 psychometric properties of the Japanese version of the European Organization for  
45  
46 Research and Treatment of Cancer Quality of Life Questionnaire Core 15 palliative  
47  
48 (EORTCQLQ-C15-PAL). Qual Life Res. 2012;21:335-40.  
49  
50
- 51 24. Zigmond AS, Snaith RP. The hospital anxiety and depression scale. Acta Psychiatr Scand.  
52  
53 1983;67:361-70.  
54  
55
- 56 25. Kugaya A, Akechi T, Okuyama T, Okamura H, Uchitomi Y. Screening for psychological  
57  
58  
59  
60



- 1  
2  
3           distress in Japanese cancer patients. *Jpn J Clin Oncol.* 1998;28:333-8.  
4  
5           26. Utne I, Miaskowski C, Bjordal K, Paul SM, Jakobsen G, Rustøen T. Differences in the  
6           use of pain coping strategies between oncology inpatients with mild vs. moderate to severe  
7           pain. *J Pain Symptom Manage.* 2009;38:717-26.  
8  
9           27. Matsuoka H, Sakano Y. Assessment of cognitive aspect of pain: Development, reliability,  
10           and validation of Japanese version of pain catastrophizing scale. *Jpn J Psychosoma Med.*  
11           2007;47:95-102.  
12  
13           28. Oken MM, Creech RH, Tormey DC, Horton J, Davis TE, McFadden ET, et al. Toxicity  
14           and response criteria of the Eastern Cooperative Oncology Group. *Am J Clin Oncol.*  
15           1982;5:649-55.  
16  
17           29. Toth C. Substitution of gabapentin therapy with pregabalin therapy in neuropathic pain  
18           due to peripheral neuropathy. *Pain Med.* 2010;11:456-65  
19  
20           30. Senn SJ. *Cross-Over Trials in Clinical Research.* John Wiley & Sons: Chichester; 2002.  
21  
22           31. Atkinson TM, Mendoza TR, Sit L, Passik S, Scher HI, Cleeland C et al. The Brief Pain  
23           Inventory and its "pain at its worst in the last 24 hours" item: clinical trial endpoint  
24           considerations. *Pain Med.* 2010;11:337-46.  
25  
26           32. McNicol ED, Midbari A, Eisenberg E. Opioids for neuropathic pain. *Cochrane Database*  
27           *Syst Rev.* 2013;29:8 CD006146. doi: 10.1002/14651858.CD006146.pub2.  
28  
29  
30  
31  
32  
33  
34  
35  
36  
37  
38  
39  
40  
41  
42  
43  
44  
45  
46  
47  
48  
49  
50  
51  
52  
53  
54  
55  
56  
57  
58  
59  
60

### Figure Legends

Figure 1. Flow chart of the procedures in the study. Participants will be randomized (1:1 allocation ratio) into the duloxetine intervention group or the placebo control group.

Evaluations will be made at baseline (T0 randomization), and on day 0 (T1), day 3 (T2), and day 10 (T3).

For peer review only

## Box 1. Inclusion and exclusion criteria

---

**Inclusion Criteria**

---

- Inpatients and outpatients with diagnoses of cancer and neuropathic pain
- Currently receiving opioids
- Unresponsive or intolerant to gabapentinoids: a) receiving doses of pregabalin of 300 mg/day or higher or gabapentin of 1800 mg/day or higher; b) cannot receive increased doses of pregabalin or gabapentin due to side effects
- NRS pain score of 4 or higher
- HADS score <20
- Age 20 years or older
- Creatinine clearance rate (Ccr)  $\geq$ 30 mL/min (Cockcroft-Gault formula)
- Serum aspartate aminotransferase (AST) <100 IU/L, alanine aminotransferase (ALT) <100 IU/L, and total bilirubin (T-bil) <2.0 mg/dL
- Expected survival of one month or longer

---

**Exclusion Criteria**

---

- Chemotherapy-induced peripheral neuropathy
  - Progressive paralytic symptoms
  - Contraindication for duloxetine
  - Taking any type of antidepressants
  - A change in steroids, opioids, antidepressants, anticonvulsants, antipsychotic drugs, antiarrhythmic agents, or N-methyl-D-aspartate (NMDA) receptor antagonists within two days of initiation of administration of the study drug. Cases in which the patient has taken a hypnotic (including benzodiazepines such as zolpidem, zopiclone, eszopiclone, triazolam, ramelteon, suvorexant, brotizolam, flunitrazepam, rilmazafone, and etizolam) as needed are not included.
  - Drug abusers or patients who are addicted to drugs or have a history of addiction
  - Patients with psychiatric disorders such as cognitive impairment who are unable to communicate
  - Patients who are pregnant, breastfeeding, or may possibly be pregnant
  - Other patients who are determined to be inappropriate for participation in the study by the clinical investigator.
-

Table 1. Study procedure and time points for actions and evaluations

|                            | T0        | T1    | T2    | T3     |
|----------------------------|-----------|-------|-------|--------|
|                            | Inclusion | Day 0 | Day 3 | Day 10 |
| Consent, Randomization     | ○         | —     | —     | —      |
| NRS for pain               | ○         | ○     | ○     | ○      |
| Pain Relief Scale          | —         | —     | ○     | —      |
| SF-MPQ-2                   | —         | ○     | —     | —      |
| Opioid consumption         | —         | ○     | ○     | ○      |
| EORTC-QLQ-C15 Pal          | —         | ○     | —     | ○      |
| HADS                       | ○         | —     | —     | ○      |
| Pain Catastrophizing Scale | —         | ○     | —     | —      |
| ECOG PS                    | ○         | ○     | —     | ○      |
| Adverse events             | —         | ○     | ○     | ○      |

1  
2  
3  
4  
5  
6  
7  
8  
9  
10  
11  
12  
13  
14  
15  
16  
17  
18  
19  
20  
21  
22  
23  
24  
25  
26  
27  
28  
29  
30  
31  
32  
33  
34  
35  
36  
37  
38  
39  
40  
41  
42  
43  
44  
45  
46  
47  
48  
49  
50  
51  
52  
53  
54  
55  
56  
57  
58  
59  
60

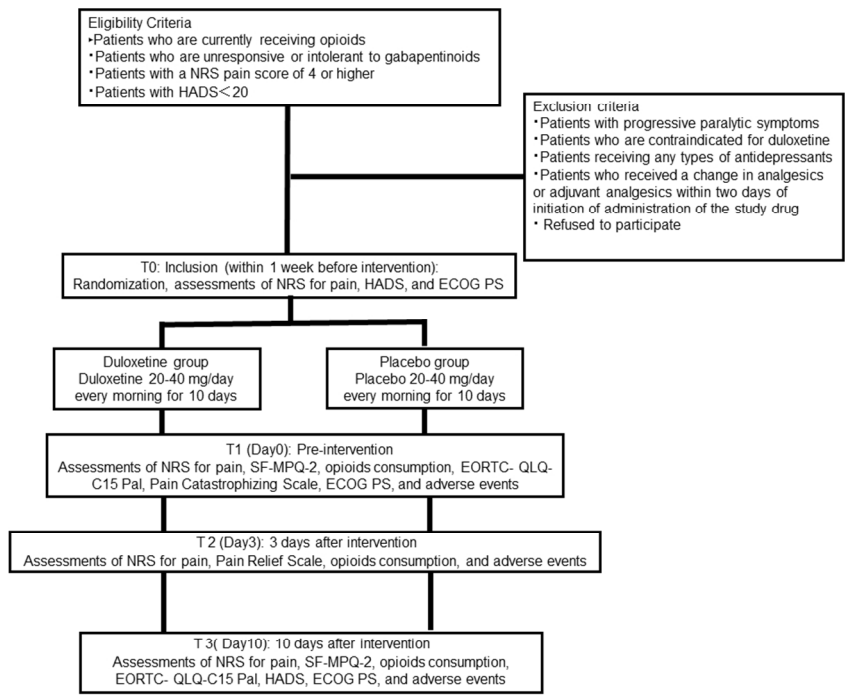

Fig.1. Flow chart of the procedures in the study

300x225mm (96 x 96 DPI)

ew only

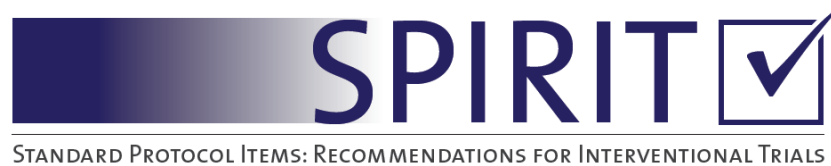

SPIRIT 2013 Checklist: Recommended items to address in a clinical trial protocol and related documents\*

| Section/item                      | Item No | Description                                                                                                                                                                                                                                                                              | Addressed on page number |
|-----------------------------------|---------|------------------------------------------------------------------------------------------------------------------------------------------------------------------------------------------------------------------------------------------------------------------------------------------|--------------------------|
| <b>Administrative information</b> |         |                                                                                                                                                                                                                                                                                          |                          |
| Title                             | 1       | Descriptive title identifying the study design, population, interventions, and, if applicable, trial acronym                                                                                                                                                                             | 1                        |
| Trial registration                | 2a      | Trial identifier and registry name. If not yet registered, name of intended registry                                                                                                                                                                                                     | 4                        |
|                                   | 2b      | All items from the World Health Organization Trial Registration Data Set                                                                                                                                                                                                                 | ✘ 1                      |
| Protocol version                  | 3       | Date and version identifier                                                                                                                                                                                                                                                              | 4                        |
| Funding                           | 4       | Sources and types of financial, material, and other support                                                                                                                                                                                                                              | 18                       |
| Roles and responsibilities        | 5a      | Names, affiliations, and roles of protocol contributors                                                                                                                                                                                                                                  | 18                       |
|                                   | 5b      | Name and contact information for the trial sponsor                                                                                                                                                                                                                                       | 18                       |
|                                   | 5c      | Role of study sponsor and funders, if any, in study design; collection, management, analysis, and interpretation of data; writing of the report; and the decision to submit the report for publication, including whether they will have ultimate authority over any of these activities | Not applicable           |
|                                   | 5d      | Composition, roles, and responsibilities of the coordinating centre, steering committee, endpoint adjudication committee, data management team, and other individuals or groups overseeing the trial, if applicable (see Item 21a for data monitoring committee)                         | ✘ 1                      |

**Introduction**

|    |                                                           |     |                                                                                                               |           |
|----|-----------------------------------------------------------|-----|---------------------------------------------------------------------------------------------------------------|-----------|
| 1  | Background and                                            | 6a  | Description of research question and justification for undertaking the trial, including summary of relevant   | 6         |
| 2  | rationale                                                 |     | studies (published and unpublished) examining benefits and harms for each intervention                        |           |
| 3  |                                                           |     |                                                                                                               |           |
| 4  |                                                           | 6b  | Explanation for choice of comparators                                                                         | 13        |
| 5  |                                                           |     |                                                                                                               |           |
| 6  | Objectives                                                | 7   | Specific objectives or hypotheses                                                                             | 6         |
| 7  |                                                           |     |                                                                                                               |           |
| 8  | Trial design                                              | 8   | Description of trial design including type of trial (eg, parallel group, crossover, factorial, single group), |           |
| 9  |                                                           |     | allocation ratio, and framework (eg, superiority, equivalence, noninferiority, exploratory)                   | 6         |
| 10 |                                                           |     |                                                                                                               |           |
| 11 |                                                           |     |                                                                                                               |           |
| 12 | <b>Methods: Participants, interventions, and outcomes</b> |     |                                                                                                               |           |
| 13 |                                                           |     |                                                                                                               |           |
| 14 | Study setting                                             | 9   | Description of study settings (eg, community clinic, academic hospital) and list of countries where data will | 7         |
| 15 |                                                           |     | be collected. Reference to where list of study sites can be obtained                                          |           |
| 16 |                                                           |     |                                                                                                               |           |
| 17 | Eligibility criteria                                      | 10  | Inclusion and exclusion criteria for participants. If applicable, eligibility criteria for study centres and  | 7, Box1   |
| 18 |                                                           |     | individuals who will perform the interventions (eg, surgeons, psychotherapists)                               |           |
| 19 |                                                           |     |                                                                                                               |           |
| 20 | Interventions                                             | 11a | Interventions for each group with sufficient detail to allow replication, including how and when they will be | 12-13     |
| 21 |                                                           |     | administered                                                                                                  |           |
| 22 |                                                           |     |                                                                                                               |           |
| 23 |                                                           | 11b | Criteria for discontinuing or modifying allocated interventions for a given trial participant (eg, drug dose  | 12-13     |
| 24 |                                                           |     | change in response to harms, participant request, or improving/worsening disease)                             |           |
| 25 |                                                           |     |                                                                                                               |           |
| 26 |                                                           | 11c | Strategies to improve adherence to intervention protocols, and any procedures for monitoring adherence        | 12-13     |
| 27 |                                                           |     | (eg, drug tablet return, laboratory tests)                                                                    |           |
| 28 |                                                           |     |                                                                                                               |           |
| 29 |                                                           | 11d | Relevant concomitant care and interventions that are permitted or prohibited during the trial                 | 13        |
| 30 |                                                           |     |                                                                                                               |           |
| 31 | Outcomes                                                  | 12  | Primary, secondary, and other outcomes, including the specific measurement variable (eg, systolic blood       | 13-14     |
| 32 |                                                           |     | pressure), analysis metric (eg, change from baseline, final value, time to event), method of aggregation (eg, |           |
| 33 |                                                           |     | median, proportion), and time point for each outcome. Explanation of the clinical relevance of chosen         |           |
| 34 |                                                           |     | efficacy and harm outcomes is strongly recommended                                                            |           |
| 35 |                                                           |     |                                                                                                               |           |
| 36 |                                                           |     |                                                                                                               |           |
| 37 |                                                           |     |                                                                                                               |           |
| 38 | Participant timeline                                      | 13  | Time schedule of enrolment, interventions (including any run-ins and washouts), assessments, and visits for   | 9, Table1 |
| 39 |                                                           |     | participants. A schematic diagram is highly recommended (see Figure)                                          |           |
| 40 |                                                           |     |                                                                                                               |           |
| 41 |                                                           |     |                                                                                                               |           |
| 42 |                                                           |     |                                                                                                               |           |
| 43 |                                                           |     |                                                                                                               |           |
| 44 |                                                           |     |                                                                                                               |           |
| 45 |                                                           |     |                                                                                                               |           |
| 46 |                                                           |     |                                                                                                               |           |
| 47 |                                                           |     |                                                                                                               |           |

|    |                                                                     |     |                                                                                                                                                                                                                                                                                                                                                                                                              |       |
|----|---------------------------------------------------------------------|-----|--------------------------------------------------------------------------------------------------------------------------------------------------------------------------------------------------------------------------------------------------------------------------------------------------------------------------------------------------------------------------------------------------------------|-------|
| 1  | Sample size                                                         | 14  | Estimated number of participants needed to achieve study objectives and how it was determined, including clinical and statistical assumptions supporting any sample size calculations                                                                                                                                                                                                                        | 14-15 |
| 2  |                                                                     |     |                                                                                                                                                                                                                                                                                                                                                                                                              |       |
| 3  |                                                                     |     |                                                                                                                                                                                                                                                                                                                                                                                                              |       |
| 4  | Recruitment                                                         | 15  | Strategies for achieving adequate participant enrolment to reach target sample size                                                                                                                                                                                                                                                                                                                          | 8,9   |
| 5  |                                                                     |     |                                                                                                                                                                                                                                                                                                                                                                                                              |       |
| 6  |                                                                     |     |                                                                                                                                                                                                                                                                                                                                                                                                              |       |
| 7  | <b>Methods: Assignment of interventions (for controlled trials)</b> |     |                                                                                                                                                                                                                                                                                                                                                                                                              |       |
| 8  |                                                                     |     |                                                                                                                                                                                                                                                                                                                                                                                                              |       |
| 9  | Allocation:                                                         |     |                                                                                                                                                                                                                                                                                                                                                                                                              |       |
| 10 |                                                                     |     |                                                                                                                                                                                                                                                                                                                                                                                                              |       |
| 11 | Sequence                                                            | 16a | Method of generating the allocation sequence (eg, computer-generated random numbers), and list of any factors for stratification. To reduce predictability of a random sequence, details of any planned restriction (eg, blocking) should be provided in a separate document that is unavailable to those who enrol participants or assign interventions                                                     | 8     |
| 12 | generation                                                          |     |                                                                                                                                                                                                                                                                                                                                                                                                              |       |
| 13 |                                                                     |     |                                                                                                                                                                                                                                                                                                                                                                                                              |       |
| 14 |                                                                     |     |                                                                                                                                                                                                                                                                                                                                                                                                              |       |
| 15 |                                                                     |     |                                                                                                                                                                                                                                                                                                                                                                                                              |       |
| 16 | Allocation                                                          | 16b | Mechanism of implementing the allocation sequence (eg, central telephone; sequentially numbered, opaque, sealed envelopes), describing any steps to conceal the sequence until interventions are assigned                                                                                                                                                                                                    | 8     |
| 17 | concealment                                                         |     |                                                                                                                                                                                                                                                                                                                                                                                                              |       |
| 18 | mechanism                                                           |     |                                                                                                                                                                                                                                                                                                                                                                                                              |       |
| 19 |                                                                     |     |                                                                                                                                                                                                                                                                                                                                                                                                              |       |
| 20 |                                                                     |     |                                                                                                                                                                                                                                                                                                                                                                                                              |       |
| 21 | Implementation                                                      | 16c | Who will generate the allocation sequence, who will enrol participants, and who will assign participants to interventions                                                                                                                                                                                                                                                                                    | 8     |
| 22 |                                                                     |     |                                                                                                                                                                                                                                                                                                                                                                                                              |       |
| 23 |                                                                     |     |                                                                                                                                                                                                                                                                                                                                                                                                              |       |
| 24 | Blinding (masking)                                                  | 17a | Who will be blinded after assignment to interventions (eg, trial participants, care providers, outcome assessors, data analysts), and how                                                                                                                                                                                                                                                                    | 8-9   |
| 25 |                                                                     |     |                                                                                                                                                                                                                                                                                                                                                                                                              |       |
| 26 |                                                                     |     |                                                                                                                                                                                                                                                                                                                                                                                                              |       |
| 27 |                                                                     |     |                                                                                                                                                                                                                                                                                                                                                                                                              |       |
| 28 |                                                                     | 17b | If blinded, circumstances under which unblinding is permissible, and procedure for revealing a participant's allocated intervention during the trial                                                                                                                                                                                                                                                         | 8-9   |
| 29 |                                                                     |     |                                                                                                                                                                                                                                                                                                                                                                                                              |       |
| 30 |                                                                     |     |                                                                                                                                                                                                                                                                                                                                                                                                              |       |
| 31 |                                                                     |     |                                                                                                                                                                                                                                                                                                                                                                                                              |       |
| 32 | <b>Methods: Data collection, management, and analysis</b>           |     |                                                                                                                                                                                                                                                                                                                                                                                                              |       |
| 33 |                                                                     |     |                                                                                                                                                                                                                                                                                                                                                                                                              |       |
| 34 | Data collection                                                     | 18a | Plans for assessment and collection of outcome, baseline, and other trial data, including any related processes to promote data quality (eg, duplicate measurements, training of assessors) and a description of study instruments (eg, questionnaires, laboratory tests) along with their reliability and validity, if known. Reference to where data collection forms can be found, if not in the protocol | 10    |
| 35 | methods                                                             |     |                                                                                                                                                                                                                                                                                                                                                                                                              |       |
| 36 |                                                                     |     |                                                                                                                                                                                                                                                                                                                                                                                                              |       |
| 37 |                                                                     |     |                                                                                                                                                                                                                                                                                                                                                                                                              |       |
| 38 |                                                                     |     |                                                                                                                                                                                                                                                                                                                                                                                                              |       |
| 39 |                                                                     |     |                                                                                                                                                                                                                                                                                                                                                                                                              |       |
| 40 |                                                                     | 18b | Plans to promote participant retention and complete follow-up, including list of any outcome data to be collected for participants who discontinue or deviate from intervention protocols                                                                                                                                                                                                                    | 13    |
| 41 |                                                                     |     |                                                                                                                                                                                                                                                                                                                                                                                                              |       |
| 42 |                                                                     |     |                                                                                                                                                                                                                                                                                                                                                                                                              |       |
| 43 |                                                                     |     |                                                                                                                                                                                                                                                                                                                                                                                                              |       |
| 44 |                                                                     |     |                                                                                                                                                                                                                                                                                                                                                                                                              |       |
| 45 |                                                                     |     |                                                                                                                                                                                                                                                                                                                                                                                                              |       |
| 46 |                                                                     |     |                                                                                                                                                                                                                                                                                                                                                                                                              |       |
| 47 |                                                                     |     |                                                                                                                                                                                                                                                                                                                                                                                                              |       |



|    |                                 |     |                                                                                                                                                                                                                                                                                                                                       |     |
|----|---------------------------------|-----|---------------------------------------------------------------------------------------------------------------------------------------------------------------------------------------------------------------------------------------------------------------------------------------------------------------------------------------|-----|
| 1  | Data management                 | 19  | Plans for data entry, coding, security, and storage, including any related processes to promote data quality (eg, double data entry; range checks for data values). Reference to where details of data management procedures can be found, if not in the protocol                                                                     | ※ 2 |
| 2  |                                 |     |                                                                                                                                                                                                                                                                                                                                       |     |
| 3  |                                 |     |                                                                                                                                                                                                                                                                                                                                       |     |
| 4  |                                 |     |                                                                                                                                                                                                                                                                                                                                       |     |
| 5  | Statistical methods             | 20a | Statistical methods for analysing primary and secondary outcomes. Reference to where other details of the statistical analysis plan can be found, if not in the protocol                                                                                                                                                              | 14  |
| 6  |                                 |     |                                                                                                                                                                                                                                                                                                                                       |     |
| 7  |                                 |     |                                                                                                                                                                                                                                                                                                                                       |     |
| 8  |                                 | 20b | Methods for any additional analyses (eg, subgroup and adjusted analyses)                                                                                                                                                                                                                                                              | 14  |
| 9  |                                 |     |                                                                                                                                                                                                                                                                                                                                       |     |
| 10 |                                 | 20c | Definition of analysis population relating to protocol non-adherence (eg, as randomised analysis), and any statistical methods to handle missing data (eg, multiple imputation)                                                                                                                                                       | ※ 3 |
| 11 |                                 |     |                                                                                                                                                                                                                                                                                                                                       |     |
| 12 |                                 |     |                                                                                                                                                                                                                                                                                                                                       |     |
| 13 |                                 |     |                                                                                                                                                                                                                                                                                                                                       |     |
| 14 |                                 |     |                                                                                                                                                                                                                                                                                                                                       |     |
| 15 | <b>Methods: Monitoring</b>      |     |                                                                                                                                                                                                                                                                                                                                       |     |
| 16 |                                 |     |                                                                                                                                                                                                                                                                                                                                       |     |
| 17 | Data monitoring                 | 21a | Composition of data monitoring committee (DMC); summary of its role and reporting structure; statement of whether it is independent from the sponsor and competing interests; and reference to where further details about its charter can be found, if not in the protocol. Alternatively, an explanation of why a DMC is not needed | ※ 1 |
| 18 |                                 |     |                                                                                                                                                                                                                                                                                                                                       |     |
| 19 |                                 |     |                                                                                                                                                                                                                                                                                                                                       |     |
| 20 |                                 |     |                                                                                                                                                                                                                                                                                                                                       |     |
| 21 |                                 |     |                                                                                                                                                                                                                                                                                                                                       |     |
| 22 |                                 | 21b | Description of any interim analyses and stopping guidelines, including who will have access to these interim results and make the final decision to terminate the trial                                                                                                                                                               | 9   |
| 23 |                                 |     |                                                                                                                                                                                                                                                                                                                                       |     |
| 24 |                                 |     |                                                                                                                                                                                                                                                                                                                                       |     |
| 25 |                                 |     |                                                                                                                                                                                                                                                                                                                                       |     |
| 26 | Harms                           | 22  | Plans for collecting, assessing, reporting, and managing solicited and spontaneously reported adverse events and other unintended effects of trial interventions or trial conduct                                                                                                                                                     | 10  |
| 27 |                                 |     |                                                                                                                                                                                                                                                                                                                                       |     |
| 28 |                                 |     |                                                                                                                                                                                                                                                                                                                                       |     |
| 29 | Auditing                        | 23  | Frequency and procedures for auditing trial conduct, if any, and whether the process will be independent from investigators and the sponsor                                                                                                                                                                                           | 9   |
| 30 |                                 |     |                                                                                                                                                                                                                                                                                                                                       |     |
| 31 |                                 |     |                                                                                                                                                                                                                                                                                                                                       |     |
| 32 |                                 |     |                                                                                                                                                                                                                                                                                                                                       |     |
| 33 | <b>Ethics and dissemination</b> |     |                                                                                                                                                                                                                                                                                                                                       |     |
| 34 |                                 |     |                                                                                                                                                                                                                                                                                                                                       |     |
| 35 | Research ethics approval        | 24  | Plans for seeking research ethics committee/institutional review board (REC/IRB) approval                                                                                                                                                                                                                                             | 15  |
| 36 |                                 |     |                                                                                                                                                                                                                                                                                                                                       |     |
| 37 |                                 |     |                                                                                                                                                                                                                                                                                                                                       |     |
| 38 | Protocol amendments             | 25  | Plans for communicating important protocol modifications (eg, changes to eligibility criteria, outcomes, analyses) to relevant parties (eg, investigators, REC/IRBs, trial participants, trial registries, journals, regulators)                                                                                                      | 15  |
| 39 |                                 |     |                                                                                                                                                                                                                                                                                                                                       |     |
| 40 |                                 |     |                                                                                                                                                                                                                                                                                                                                       |     |
| 41 |                                 |     |                                                                                                                                                                                                                                                                                                                                       |     |
| 42 |                                 |     |                                                                                                                                                                                                                                                                                                                                       |     |
| 43 |                                 |     |                                                                                                                                                                                                                                                                                                                                       |     |
| 44 |                                 |     |                                                                                                                                                                                                                                                                                                                                       |     |
| 45 |                                 |     |                                                                                                                                                                                                                                                                                                                                       |     |
| 46 |                                 |     |                                                                                                                                                                                                                                                                                                                                       |     |
| 47 |                                 |     |                                                                                                                                                                                                                                                                                                                                       |     |

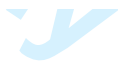

|    |                               |     |                                                                                                                                                                                                                                                                                     |                |
|----|-------------------------------|-----|-------------------------------------------------------------------------------------------------------------------------------------------------------------------------------------------------------------------------------------------------------------------------------------|----------------|
| 1  | Consent or assent             | 26a | Who will obtain informed consent or assent from potential trial participants or authorised surrogates, and how (see Item 32)                                                                                                                                                        | 8              |
| 2  |                               |     |                                                                                                                                                                                                                                                                                     |                |
| 3  |                               |     |                                                                                                                                                                                                                                                                                     |                |
| 4  |                               | 26b | Additional consent provisions for collection and use of participant data and biological specimens in ancillary studies, if applicable                                                                                                                                               | Not applicable |
| 5  |                               |     |                                                                                                                                                                                                                                                                                     |                |
| 6  |                               |     |                                                                                                                                                                                                                                                                                     |                |
| 7  | Confidentiality               | 27  | How personal information about potential and enrolled participants will be collected, shared, and maintained in order to protect confidentiality before, during, and after the trial                                                                                                | 16-17          |
| 8  |                               |     |                                                                                                                                                                                                                                                                                     |                |
| 9  |                               |     |                                                                                                                                                                                                                                                                                     |                |
| 10 | Declaration of interests      | 28  | Financial and other competing interests for principal investigators for the overall trial and each study site                                                                                                                                                                       | 17             |
| 11 |                               |     |                                                                                                                                                                                                                                                                                     |                |
| 12 |                               |     |                                                                                                                                                                                                                                                                                     |                |
| 13 |                               |     |                                                                                                                                                                                                                                                                                     |                |
| 14 | Access to data                | 29  | Statement of who will have access to the final trial dataset, and disclosure of contractual agreements that limit such access for investigators                                                                                                                                     | 17             |
| 15 |                               |     |                                                                                                                                                                                                                                                                                     |                |
| 16 |                               |     |                                                                                                                                                                                                                                                                                     |                |
| 17 | Ancillary and post-trial care | 30  | Provisions, if any, for ancillary and post-trial care, and for compensation to those who suffer harm from trial participation                                                                                                                                                       | 10             |
| 18 |                               |     |                                                                                                                                                                                                                                                                                     |                |
| 19 |                               |     |                                                                                                                                                                                                                                                                                     |                |
| 20 | Dissemination policy          | 31a | Plans for investigators and sponsor to communicate trial results to participants, healthcare professionals, the public, and other relevant groups (eg, via publication, reporting in results databases, or other data sharing arrangements), including any publication restrictions | ※ 4            |
| 21 |                               |     |                                                                                                                                                                                                                                                                                     |                |
| 22 |                               |     |                                                                                                                                                                                                                                                                                     |                |
| 23 |                               |     |                                                                                                                                                                                                                                                                                     |                |
| 24 |                               |     |                                                                                                                                                                                                                                                                                     |                |
| 25 |                               | 31b | Authorship eligibility guidelines and any intended use of professional writers                                                                                                                                                                                                      | 17             |
| 26 |                               |     |                                                                                                                                                                                                                                                                                     |                |
| 27 |                               | 31c | Plans, if any, for granting public access to the full protocol, participant-level dataset, and statistical code                                                                                                                                                                     | Not planned    |
| 28 |                               |     |                                                                                                                                                                                                                                                                                     |                |
| 29 |                               |     |                                                                                                                                                                                                                                                                                     |                |
| 30 | <b>Appendices</b>             |     |                                                                                                                                                                                                                                                                                     |                |
| 31 |                               |     |                                                                                                                                                                                                                                                                                     |                |
| 32 | Informed consent materials    | 32  | Model consent form and other related documentation given to participants and authorised surrogates                                                                                                                                                                                  | 15             |
| 33 |                               |     |                                                                                                                                                                                                                                                                                     |                |
| 34 |                               |     |                                                                                                                                                                                                                                                                                     |                |
| 35 | Biological specimens          | 33  | Plans for collection, laboratory evaluation, and storage of biological specimens for genetic or molecular analysis in the current trial and for future use in ancillary studies, if applicable                                                                                      | Not applicable |
| 36 |                               |     |                                                                                                                                                                                                                                                                                     |                |
| 37 |                               |     |                                                                                                                                                                                                                                                                                     |                |

\*It is strongly recommended that this checklist be read in conjunction with the SPIRIT 2013 Explanation & Elaboration for important clarification on the items. Amendments to the protocol should be tracked and dated. The SPIRIT checklist is copyrighted by the SPIRIT Group under the Creative Commons "[Attribution-NonCommercial-NoDerivs 3.0 Unported](https://creativecommons.org/licenses/by-nc-nd/3.0/)" license.

1 ※1 : Not stated in the protocol paper due to word limits.

2 ※2 : There is a statement in the data management plan, however not stated in the protocol paper due to word limits.

3 ※3 : There is a statement in the statistical analyses plan (definition of analysis population relating to protocol non-adherence, and any statistical methods to handle missing  
4 data) however not stated in the protocol paper due to word limits.

5 ※4 : There is a statement in the Informed consent form, however, not stated in the protocol paper due to word limits.  
6  
7  
8  
9

10  
11  
12  
13  
14  
15  
16  
17  
18  
19  
20  
21  
22  
23  
24  
25  
26  
27  
28  
29  
30  
31  
32  
33  
34  
35  
36  
37  
38  
39  
40  
41  
42  
43  
44  
45  
46  
47

For peer review only

# BMJ Open

## Study protocol for a multi-institutional, randomised, double-blinded, placebo-controlled phase III trial investigating additive efficacy of duloxetine for neuropathic cancer pain refractory to opioids and gabapentinoids: the DIRECT study



|                                 |                                                                                                                                                                                                                                                                                                                                                                                                                                                                                                                                                                                                                                                                                                                                                                                                                                                                                                                                                                                                                                                                                                                                                                          |
|---------------------------------|--------------------------------------------------------------------------------------------------------------------------------------------------------------------------------------------------------------------------------------------------------------------------------------------------------------------------------------------------------------------------------------------------------------------------------------------------------------------------------------------------------------------------------------------------------------------------------------------------------------------------------------------------------------------------------------------------------------------------------------------------------------------------------------------------------------------------------------------------------------------------------------------------------------------------------------------------------------------------------------------------------------------------------------------------------------------------------------------------------------------------------------------------------------------------|
| Journal:                        | <i>BMJ Open</i>                                                                                                                                                                                                                                                                                                                                                                                                                                                                                                                                                                                                                                                                                                                                                                                                                                                                                                                                                                                                                                                                                                                                                          |
| Manuscript ID                   | bmjopen-2017-017280.R1                                                                                                                                                                                                                                                                                                                                                                                                                                                                                                                                                                                                                                                                                                                                                                                                                                                                                                                                                                                                                                                                                                                                                   |
| Article Type:                   | Protocol                                                                                                                                                                                                                                                                                                                                                                                                                                                                                                                                                                                                                                                                                                                                                                                                                                                                                                                                                                                                                                                                                                                                                                 |
| Date Submitted by the Author:   | 06-Jul-2017                                                                                                                                                                                                                                                                                                                                                                                                                                                                                                                                                                                                                                                                                                                                                                                                                                                                                                                                                                                                                                                                                                                                                              |
| Complete List of Authors:       | Matsuoka, Hiromichi; Kindai University Faculty of Medicine,, Department of Psychosomatic Medicine<br>Ishiki, Hiroto; National Cancer Center Hospital, Department of Palliative Medicine<br>Iwase, Satoru; Institute of Medical Science, The University of Tokyo,, Department of Palliative Medicine<br>Koyama, Atsuko; Kindai University Faculty of Medicine,, Department of Psychosomatic Medicine<br>Kawaguchi, Takashi; Tokyo University of Pharmacy and Life Sciences, Department of Practical Pharmacy<br>Kizawa, Yoshiyuki; Kobe University Graduate School of Medicine, Department of Palliative Medicine<br>Morita, Tatsuya; Seirei Mikatahara General Hospital, Palliative and Supportive Care Division<br>Matsuda, Yoshinobu; National Hospital Organization Kinki-Chuo Chest Medical Center, Department of Psychosomatic Internal Medicine<br>Miyaji, Tempei; Graduate School of Medicine, The, Department of Clinical Trial Data Management<br>Ariyoshi, Keisuke; Institute of Medical Science, The University of Tokyo,, Department of Palliative Medicine<br>Yamaguchi, Takuhiro; Tohoku University Graduate School of Medicine, Division of Biostatistics |
| <b>Primary Subject Heading</b>: | Palliative care                                                                                                                                                                                                                                                                                                                                                                                                                                                                                                                                                                                                                                                                                                                                                                                                                                                                                                                                                                                                                                                                                                                                                          |
| Secondary Subject Heading:      | Palliative care                                                                                                                                                                                                                                                                                                                                                                                                                                                                                                                                                                                                                                                                                                                                                                                                                                                                                                                                                                                                                                                                                                                                                          |
| Keywords:                       | Adult palliative care < PALLIATIVE CARE, Cancer pain < ONCOLOGY, PAIN MANAGEMENT                                                                                                                                                                                                                                                                                                                                                                                                                                                                                                                                                                                                                                                                                                                                                                                                                                                                                                                                                                                                                                                                                         |
|                                 |                                                                                                                                                                                                                                                                                                                                                                                                                                                                                                                                                                                                                                                                                                                                                                                                                                                                                                                                                                                                                                                                                                                                                                          |

SCHOLARONE™  
Manuscripts

## STUDY PROTOCOL

### **Study protocol for a multi-institutional, randomised, double-blinded, placebo-controlled phase III trial investigating additive efficacy of duloxetine for neuropathic cancer pain refractory to opioids and gabapentinoids: the DIRECT study**

Hiromichi Matsuoka<sup>1,2</sup>, Hiroto Ishiki<sup>3</sup>, Satoru Iwase<sup>4</sup>, Atsuko Koyama<sup>1,2</sup>, Takashi Kawaguchi<sup>5</sup>, Yoshiyuki Kizawa<sup>6</sup>, Tatsuya Morita<sup>7</sup>, Yoshinobu Matsuda<sup>8</sup>, Tempei Miyaji<sup>9</sup>, Keisuke Ariyoshi<sup>4,10</sup>, Takuhiro Yamaguchi<sup>9,11</sup>

<sup>1</sup> Palliative Care Center, Cancer Center, Kindai University Hospital, Osaka, Japan

<sup>2</sup> Department of Psychosomatic Medicine, Kindai University Faculty of Medicine, Osaka, Japan

<sup>3</sup> Department of Palliative Medicine, National Cancer Center Hospital, Tokyo, Japan.

<sup>4</sup> Department of Palliative Medicine, Institute of Medical Science, The University of Tokyo, Tokyo, Japan

<sup>5</sup> Department of Practical Pharmacy, Tokyo University of Pharmacy and Life Sciences, Tokyo, Japan

<sup>6</sup> Department of Palliative Medicine, Kobe University Graduate School of Medicine, Kobe, Japan

<sup>7</sup> Palliative and Supportive Care Division, Seirei Mikatahara General Hospital, Hamamatsu, Japan

<sup>8</sup> Department of Psychosomatic Internal Medicine, National Hospital Organization Kinki-Chuo Chest Medical Center, Sakai, Japan

<sup>9</sup> Department of Clinical Trial Data Management, Graduate School of Medicine, The University of Tokyo, Tokyo, Japan

<sup>10</sup> Japanese Organization for Research and Treatment of Cancer (JORTC), NPO, Tokyo, Japan

<sup>11</sup> Division of Biostatistics, Tohoku University Graduate School of Medicine, Sendai, Japan

Corresponding Author: Hiromichi Matsuoka

377-2 Ohno-higashi, Osakasayama City, Osaka, 589-8511

TEL: +81-72-366-0221

1  
2  
3 FAX: +81-72-365-3417

4 E-mail:matsuoka\_h@med.kindai.ac.jp  
5  
6  
7  
8  
9  
10  
11  
12  
13  
14  
15  
16  
17  
18  
19  
20  
21  
22  
23  
24  
25  
26  
27  
28  
29  
30  
31  
32  
33  
34  
35  
36  
37  
38  
39  
40  
41  
42  
43  
44  
45  
46  
47  
48  
49  
50  
51  
52  
53  
54  
55  
56  
57  
58  
59  
60

For peer review only

## Abstract

**Introduction:** Management of cancer patients suffering from neuropathic pain refractory to opioids and gabapentinoids remains an important challenge. Duloxetine is one of the choices after first-line treatment fails. The efficacy of duloxetine has been reported in non-cancer patients and in chemotherapy-induced peripheral neuropathy, but no randomised clinical trials have examined its effects on neuropathic cancer pain refractory to first-line treatment. The objective of this study is to assess the analgesic efficacy of duloxetine in patients suffering from neuropathic cancer pain refractory to opioids and gabapentinoids.

**Methods and analysis:** A multi-institutional, prospective, randomised, double-blind, placebo-controlled, two-parallel trial is planned. The inclusion criteria are adult cancer patients suffering from neuropathic cancer pain refractory to opioids and gabapentinoids, patients with a numerical rating scale (NRS) pain score of 4 or higher, and patients with a total Hospital Anxiety and Depression Scale (HADS) score of less than 20. Patients with chemotherapy-induced peripheral neuropathy are excluded. The study will take place at 14 sites across Japan. Participants will be randomised (1:1 allocation ratio) to a duloxetine intervention group or a placebo control group. Evaluations will be made at baseline (T0 randomisation), day 0 (T1), day 3 (T2), and day 10 (T3). The primary endpoint is defined as the difference in NRS score for pain intensity (average over the previous 24 hours) at T3 between the duloxetine and placebo groups. A sample size of 70 patients will be examined between July 2015 and March 2018.

**Ethics and Dissemination:** Ethics approval was obtained at all participating sites.

The results of this study will be submitted for publication in international peer-reviewed journals and the key findings presented at international scientific conferences.

**Trial registration number:** UMIN000017647 Date of registration: 22 July 2015.

Protocol version: 2.2, 26 April 2017.

1  
2  
3  
4  
5 **Keywords** Duloxetine, Randomised controlled trial, Neuropathic cancer pain, Palliative care.  
6  
7  
8  
9  
10  
11  
12  
13  
14  
15  
16  
17  
18  
19  
20  
21  
22  
23  
24  
25  
26  
27  
28  
29  
30  
31  
32  
33  
34  
35  
36  
37  
38  
39  
40  
41  
42  
43  
44  
45  
46  
47  
48  
49  
50  
51  
52  
53  
54  
55  
56  
57  
58  
59  
60

For peer review only



### Strengths and limitation of this study

- This is the first study to assess the analgesic efficacy of duloxetine in patients suffering from neuropathic cancer pain refractory to opioids and gabapentinoids, and the results of the trial will clarify the second-line standard treatment for cancer-related neuropathic cancer pain.
- This is an adequately powered study to provide a clinically meaningful outcome, and adverse effects following interventions will be systematically evaluated.
- We excluded patients with depression from the study population for accurate evaluation of the pharmacological effects of duloxetine on pain.
- This study include the heterogeneity of causes of neuropathic cancer pain.
- The primary endpoint is not worst pain intensity in the last 24 hours but the difference in average pain intensity score at T3 (day 10) between two groups.

## Introduction

Pain is a symptom that is experienced by many patients with cancer. Prevalence at the time of diagnosis is 30%, and this increases to 90% in advanced stages [1,2]. Pain in cancer patients is often classified as nociceptive pain or neuropathic pain, but both types are thought to be intermixed. Of patients with cancer-related pain, 33% have neuropathic pain (NP) [1]. In general, NP is often resistant to treatment, whereas nociceptive pain tends to respond well to treatment [2-5].

The efficacy of many drugs for NP has been reported in non-cancer patients, and some have been shown to be effective for NP in cancer patients [6]. These drugs include opioids, tricyclic antidepressants (TCAs), and gabapentinoids (gabapentin and pregabalin) [7-11].

In cancer patients, the efficacy of TCAs and gabapentinoids has been proven in clinical trials [12, 13], and a phase III study revealed moderate analgesic effects of gabapentin in combination with opioids [14]. However, it is unclear which drug is most effective in cases in which first-line treatment with gabapentinoids fails to alleviate NP in cancer patients.

In treatment of non-cancer NP, the efficacy of addition of duloxetine to pregabalin has been shown in a phase III study [15]. There is, however, no empirical data for second-line treatment of NP in cancer patients. The National Comprehensive Cancer Network (NCCN) guidelines list duloxetine as a potential choice for second-line treatment [8], and a phase III study showed the efficacy of duloxetine in treatment of chemotherapy-induced peripheral neuropathy (CIPN) in cancer patients [16]. Furthermore, a small retrospective study reported the beneficial effects of duloxetine in palliation of NP refractory to pregabalin and opioids in 15 cancer patients [17]. On the other hand, duloxetine has the potential for adverse events such as dry mouth, sweating, fatigue, nausea, constipation, loss of appetite, dizziness, diarrhea, hot flashes, hypertension, hyperhidrosis, palpitations, insomnia, and drug-drug interactions as well as a risk of serotonergic syndrome and therefore should be used carefully

1  
2  
3 [18-20]. According to the meta-analysis in 2015 [12], 7 studies demonstrated clinical effects  
4  
5 of duloxetine but two studies revealed negative results.  
6

7 In the double-blind randomised placebo-controlled study described here, we will evaluate  
8  
9 the efficacy of addition of duloxetine for neuropathic cancer pain refractory to opioids and  
10  
11 gabapentinoids. Currently there is no specific standard treatment for neuropathic pain in  
12  
13 cancer patients, placebo is used instead of active control. The results of the trial will clarify  
14  
15 the second-line standard treatment for cancer-related NP.  
16  
17

## 18 19 20 21 **Methods and analysis**

### 22 Study design

23  
24 The SPIRIT (Standard Protocol Items for Randomised Trials) statement and its checklist were  
25  
26 followed in preparing the protocol. The study design is summarized in Figure 1. A  
27  
28 multicentre, prospective, randomised, placebo-controlled, double-blinded, two-parallel group  
29  
30 study will be performed to compare the efficacy of addition of duloxetine (intervention  
31  
32 group) with the efficacy of addition of a placebo (control group).  
33  
34  
35  
36  
37

### 38 Study Settings and Participants

39  
40 Recruiting will be performed in 14 adult palliative care sites across Japan, with  
41  
42 involvement of 10 palliative care teams and 4 palliative care units. The inclusion and  
43  
44 exclusion criteria are summarized in box 1.  
45  
46

#### 47 Box 1. Inclusion and exclusion criteria

---

##### 48 Inclusion Criteria

---

- 49 • Inpatients and outpatients with diagnoses of cancer and neuropathic pain
- 50 • Currently receiving opioids
- 51 • Unresponsive or intolerant to gabapentinoids: a) receiving doses of  
52 pregabalin of 300 mg/day or higher or gabapentin of 1800 mg/day or higher;  
53 b) cannot receive increased doses of pregabalin or gabapentin due to side  
54 effects
- 55 • NRS pain score of 4 or higher
- 56
- 57
- 58
- 59
- 60

- HADS score <20
- Age 20 years or older
- Creatinine clearance rate (Ccr)  $\geq 30$  mL/min (Cockcroft-Gault formula)
- Serum aspartate aminotransferase (AST) <100 IU/L, alanine aminotransferase (ALT) <100 IU/L, and total bilirubin (T-bil) <2.0 mg/dL
- Expected survival of one month or longer

---

#### Exclusion Criteria

---

- Chemotherapy-induced peripheral neuropathy
  - Progressive paralytic symptoms
  - Contraindication for duloxetine
  - Taking any type of antidepressants
  - A change in steroids, opioids, antidepressants, anticonvulsants, antipsychotic drugs, antiarrhythmic agents, or N-methyl-D-aspartate (NMDA) receptor antagonists within two days of initiation of administration of the study drug. Cases in which the patient has taken a hypnotic (including benzodiazepines such as zolpidem, zopiclone, eszopiclone, triazolam, ramelteon, suvorexant, brotizolam, flunitrazepam, rilmazafone, and etizolam) as needed are not included.
  - Drug abusers or patients who are addicted to drugs or have a history of addiction
  - Patients with psychiatric disorders such as cognitive impairment who are unable to communicate
  - Patients who are pregnant, breastfeeding, or may possibly be pregnant
  - Other patients who are determined to be inappropriate for participation in the study by the clinical investigator.
- 

The main inclusion criterion is patients suffering from cancer pain (neuropathic or mixed) refractory to opioids and gabapentinoids. Diagnosis of NP is based on the International Association for the Study of Pain (IASP) algorithm, in which a diagnosis of NP is made for patients with (1) pain with a distinct neuroanatomically plausible distribution; (2) a history suggestive of a relevant lesion or disease affecting the peripheral or central somatosensory system; (3) a range of pain that is neuroanatomically plausible and symptoms suggesting somatosensory injury or neurological disease (i.e., hyperalgesia, hypoalgesia, dysesthesia, or allodynia along the dermatome); and (4) relevant objective or imaging findings suggesting nervous system injury or disease (i.e., imaging findings showing that a lesion is present). Based on these criteria, the certainty of the presence of NP is grades as definite NP (1 to 4 present) and probable NP (1 and 2, plus 3 or 4) [21]. Definite and probable NP will be

1  
2  
3 considered to indicate NP and patients with these conditions will be eligible as subjects.  
4  
5 Patients with an average numerical rating scale (NRS) pain score in the preceding 24-hour  
6  
7 period of 4 or higher [22] and those with total Hospital Anxiety and Depression Scale  
8  
9 (HADS) scores of less than 20 will be included, based on criteria for pain intensity used in  
10  
11 similar studies on NP [23]. The exclusion criteria are patients with progressive paralysis, a  
12  
13 known contraindication to use of duloxetine, or depression. To examine the effects of  
14  
15 duloxetine, we believe it is necessary to exclude patients with depression because duloxetine  
16  
17 may alleviate pain through improving depression. Patients with CIPN or impaired cognitive  
18  
19 function will also be excluded.  
20  
21  
22  
23  
24

#### 25 Recruitment, randomisation, masking, and follow-up

##### 26 Recruitment

27  
28  
29 Eligible patients satisfying the screening inclusion and exclusion criteria will be invited to  
30  
31 participate in the study by site investigators.  
32  
33  
34  
35

##### 36 Randomisation

37  
38 Physicians will introduce the trial to patients. Upon enrollment and after providing informed  
39  
40 consent, patients will be randomly allocated to intervention (duloxetine) or control (placebo)  
41  
42 groups in a web-based central randomisation system using minimisation methods and a  
43  
44 computer-generated randomisation schedule with a 1:1 allocation ratio. In performing this  
45  
46 allocation, we will minimise the following adjustment factors to avoid a large bias: (1)  
47  
48 average pain intensity measured by the NRS in the last 24 h ( $\leq 7$ ,  $\geq 8$ ), (2) type of pain (spinal  
49  
50 cord infiltration or others), (3) HADS total score ( $\leq 10$ ,  $\geq 11$ ), (4) treatment setting (inpatient  
51  
52 or outpatient), (5) response to gabapentinoids (non-responsive or intolerance due to side  
53  
54 effects), and (6) study site.  
55  
56  
57  
58  
59  
60

## Masking

Patients and clinicians responsible for treatment will be blinded to administration of duloxetine or placebo. Only a clinical trial pharmacist who generate capsules, but is not involved in patient care, will know the allocation and outcomes. All study drugs will be packaged by this pharmacist. Duloxetine (Cymbalta®) will be administered with a change in dosage form: the capsules will be covered with a No. 3 capsule of the same material to make an overcapsule.

## Data management, central monitoring, and audit

Evaluations will be performed at four time points: baseline (time of randomisation, T0), the day before the start of treatment (day 0, T1), and 3 days (day 3, T2) and 10 days (day 10, T3) after initiation of treatment. The timing and details of evaluations are given in Table 1.

Table 1. Study procedure and time points for actions and evaluations

|                            | T0<br>Inclusion | T1<br>Day 0 | T2<br>Day 3 | T3<br>Day 10 |
|----------------------------|-----------------|-------------|-------------|--------------|
| Consent, Randomization     | ○               | —           | —           | —            |
| NRS for pain               | ○               | ○           | ○           | ○            |
| Pain Relief Scale          | —               | —           | ○           | —            |
| SF-MPQ-2                   | —               | ○           | —           | —            |
| Opioid consumption         | —               | ○           | ○           | ○            |
| EORTC-QLQ-C15 Pal          | —               | ○           | —           | ○            |
| HADS                       | ○               | —           | —           | ○            |
| Pain Catastrophizing Scale | —               | ○           | —           | —            |
| ECOG PS                    | ○               | ○           | —           | ○            |
| Adverse events             | —               | ○           | ○           | ○            |

Once a patient is enrolled or randomised, the study site will make every reasonable effort to follow the patient for the entire study period. Patients will not be allowed to cross over from one group to another group until the end of the study (T3), however, they can choose to leave

1  
2  
3 the study for any reasons at any time without detriment to the provision or quality of their  
4  
5 clinical care. The investigators at each study sites will maintain individual records for each  
6  
7 patient as source data, which include a copy of informed consent, medical records, laboratory  
8  
9 data and other records or notes. All data will be collected by the independent data  
10  
11 management centre. The data management centre will oversee the intra-study data sharing  
12  
13 process. The clinical data entry, data management and central monitoring will be performed  
14  
15 using the electric data capture VIEDOC 3 (PCG Solutions, Sweden). An interim analysis will  
16  
17 not be performed. Also auditing is not planned in this study.  
18  
19

## 20 21 22 23 Harms

24  
25 Investigators must record all adverse events (AEs) in the medical records and web systems.  
26  
27 The National Cancer Institute's CTCAE (Ver.4.0) will be used to grade each adverse event  
28  
29 (AE). All AEs are to be followed up continually during their course up. All severe adverse  
30  
31 events (SAEs) must be reported to Institutional Review Board (IRB) and investigators in all  
32  
33 sites, and discussed through a FAX. Patients that are enrolled into the study will be treated by  
34  
35 health care services provided by health insurance.  
36  
37  
38  
39

## 40 41 Measurement tools

### 42 43 Numerical Rating Scale (NRS)

44  
45 The 11-point NRS will be used to measure pain intensity from 0 (no pain) to 10 (worst  
46  
47 possible pain), based on average pain in the past 24 hours [24].  
48  
49

### 50 51 52 Pain Relief Scale

53  
54 A self-assessment will be performed by the patients using the Pain Relief Scale. Patients  
55  
56 will determine for themselves the efficacy of analgesics using a four-point scale of complete  
57  
58  
59  
60

1  
2  
3 relief, a lot of relief, slight relief, and no change.  
4  
5

6  
7 Short-Form McGill Pain Questionnaire 2 (SF-MPQ-2, Japanese version)  
8

9  
10 The SF-MPQ-2 will be used to examine differences in effects due to pain mechanisms. The  
11 reliability and validity of the Japanese version have been verified [25].  
12  
13

14  
15  
16 European Organization for Research and Treatment of Cancer (EORTC) QLQ-C15-PAL  
17

18 EORTC QLQ-C15-PAL will be used for evaluation of patient QOL. The reliability and  
19 validity of the Japanese version have been confirmed [26].  
20  
21  
22

23  
24  
25 Hospital Anxiety and Depression Scale (HADS)  
26

27 The HADS will be used for measurement of psychiatric symptoms (anxiety and  
28 depression) of patients with a physical disease. HADS is a screening tool that allows  
29 assessment based on a small number of items. Its reliability and validity have been verified  
30 internationally [27, 28]. A HADS score <20 points as a cutoff for exclusion of cancer patients  
31 with severe depression will be used, based on a previous report [28].  
32  
33  
34  
35  
36  
37  
38  
39

40  
41 Pain Catastrophizing Scale (PCS)  
42

43 The severity of cancer-related pain is influenced by engagement of patients in catastrophic  
44 thinking, such as "my pain will undoubtedly never improve" [29]. This effect will be  
45 measured using the Japanese version of the PCS, for which the validity and reliability have  
46 been shown [30].  
47  
48  
49  
50  
51

52  
53  
54 Common Terminology Criteria for Adverse Events (CTCAE)  
55

56 The worst grade of an adverse event during the preceding period will be assessed using the  
57  
58  
59  
60



1  
2  
3 CTCAE v.4.0, Japanese Clinical Oncology Group (JCOG) version. Five adverse events of  
4  
5 somnolence, dizziness, nausea, palpitations, and hypertension will be investigated if they  
6  
7 occur at a relatively high frequency. Other adverse events may also be assessed.  
8  
9

#### 10 11 Performance Status (PS)

12  
13  
14 The European Cooperative Oncology Group (ECOG) PS system will be used for  
15  
16 evaluation of PS by primary physicians [31].  
17  
18  
19

#### 20 21 Treatment

##### 22 23 Pre-intervention treatment

24  
25 Opioids (morphine, oxycodone, fentanyl, tapentadol) will be given to all patients. If AEs  
26  
27 of gabapentinoids are severe, they will be discontinued or reduced in dose, but if the adverse  
28  
29 effects are tolerable but the therapeutic effect is insufficient, gabapentinoids will be  
30  
31 administered concomitantly with duloxetine. Pregabalin and gabapentin will be used in the  
32  
33 study at the established effective doses of 300 mg and 1800 mg, respectively [14, 32].  
34  
35  
36  
37

##### 38 39 Interventions

40  
41 Duloxetine or placebo will be administered for 10 days. Duloxetine (20 mg/day, one  
42  
43 capsule) will be taken orally by participants in the intervention group starting after breakfast  
44  
45 on Day 1. To determine if titration is necessary, pain relief will be evaluated using the Pain  
46  
47 Relief Scale on Day 3 (T2). Changes in symptoms, adverse events, and medication  
48  
49 compliance will be evaluated. Patients who have "complete relief" or "a lot of relief" of pain  
50  
51 will continue to receive doses of 20 mg/day from Day 4. In all other cases, the dose will be  
52  
53 increased to 40 mg/day (two capsules) from Day 4. If an intolerable AE such as nausea  
54  
55 occurs at 40 mg/day, the dose will be reduced as required. If an intolerable AE occurs at 20  
56  
57  
58  
59  
60

1  
2  
3 mg/day, the protocol will be discontinued. AEs that may be caused by duloxetine, such as  
4  
5 somnolence, dizziness, nausea, palpitations, and hypertension, will be evaluated to determine  
6  
7 whether duloxetine treatment should be interrupted.  
8

9  
10 Placebo (22.4 mg lactose in a No. 4 capsule) will be administered to participants in the  
11  
12 control group by oral administration (one capsule/day) starting after breakfast on Day 1. To  
13  
14 determine if titration is necessary, pain relief will be evaluated using the Pain Relief Scale on  
15  
16 Day 3 (T2), and changes in symptoms, AEs, and medication compliance will be examined.  
17  
18 Patients with "complete relief" or "a lot of relief" of pain will continue to receive one  
19  
20 capsule/day from Day 4. In all other cases, the dose will be increased to 2 capsules/day from  
21  
22 Day 4. If an intolerable AE such as nausea occurs at 2 capsules/day, the dose will be reduced  
23  
24 as side effects dictate. If there is an intolerable AE at one capsule/day, the protocol will be  
25  
26 discontinued. To improve adherence to intervention protocols, participants will return the  
27  
28 unused tablets at the last visit, and unused tablets will be counted and recorded on the  
29  
30 medical records. Currently there is no specific standard treatment for neuropathic pain in  
31  
32 cancer patients, placebo is used instead of active control.  
33  
34  
35  
36  
37

### 38 Cotreatments

39  
40 Concomitantly administered analgesics such as opioids, non-steroidal anti-inflammatory  
41  
42 drugs (NSAIDs), acetaminophen, or other adjuvant analgesics such as anticonvulsants,  
43  
44 antidepressants, antiarrhythmics, N-methyl-D-aspartate (NMDA) receptor antagonists, and  
45  
46 steroids will not be changed during the follow-up period. In principle, new analgesics will not  
47  
48 be started. When nausea occurs during the period of duloxetine administration, use of an  
49  
50 antiemetic will be permitted. Currently used immediate-release opioids will be used in cases  
51  
52 of breakthrough pain. Immediate-release rescue opioids will be freely permitted without  
53  
54 limitation on the number of doses.  
55  
56  
57  
58  
59  
60

## Study endpoints

### Primary endpoint

The primary endpoint is a comparison of pain intensity (average pain over the previous 24 hours) at T3 (Day 10) measured using the NRS in the duloxetine and placebo groups.

### Secondary endpoints

Efficacy will also be assessed using seven secondary endpoints: the nature of pain using the SF-MPQ-2, EORTC QLQ-C15-PAL scores, daily opioid dose, changes in HADS score, degree of catastrophic thinking on the PCS, adverse events (CTCAE v.4.0-JCOG), and the difference in NRS scores for pain intensity (average over the previous 24 hours) measured at T3 in subgroups of patients who are unresponsive or intolerant to gabapentinoids. Subgroup analyses will be performed on two patients groups; patients unresponsive to gabapentinoids and patients intolerant to gabapentinoids. Additionally we will calculate percentages of the patients with 33% or 50% decrease.

## Statistical considerations

### Statistical hypothesis

Comparison of the primary endpoint of the NRS score for pain at Day 10 (T3) (average pain over the previous 24-hour period) between the duloxetine and placebo groups will be conducted using a one-sided t-test at a significance level of 5% according to the intention-to-treat (ITT) principle. Point estimates and 90% confidence intervals for the difference between two group means will be calculated.

The secondary endpoints of efficacy (SF-MPQ-2, EORTC QLQ-C15-PAL, HADS, PCS, daily opioid dose, and group comparison of average pain on the NRS in the previous 24 hours in patients who are unresponsive or intolerant to gabapentinoids) will be evaluated similarly

1  
2  
3 to the primary endpoint. The distribution of grades of adverse events (CTCAE v.4.0-JCOG)  
4  
5 and the incidence of adverse events of Grade 3 or higher and of Grade 4 or higher will be  
6  
7 determined. A Mantel test will be performed for group comparison.  
8  
9

#### 10 11 12 Sample size calculation

13  
14 The difference between group mean NRS scores for pain in the previous 24 hours on Day  
15  
16 10 (T3) is assumed to be one point and the standard deviation of the NRS is taken to be 1.5  
17  
18 points [17]. As there was no consensus about the minimal clinically important differences of  
19  
20 duloxetine in cancer neuropathic pain at the planning stage of the study, we decided to  
21  
22 adopt 1-point difference compared to placebo as the clinical significant difference, according  
23  
24 to the meta-analysis of neuropathic non-cancer pain [33]. During this study periods, Hui et al.  
25  
26 reported that the optimal cutoff was  $\geq 1$  point for improvement in cancer pain [34].  
27  
28

29  
30 Assuming a rate of exclusion of 10 percent, 35 subjects are needed in each group (70  
31  
32 subjects in total) to achieve a statistical power of 80% with a one-sided significance level of  
33  
34 5%. As our primary interest is to clarify whether duloxetine is more effective than placebo,  
35  
36 we adopted a one-sided test.  
37  
38  
39

#### 40 41 Ethical issues

42  
43 All patients will be required to provide written informed consent. The study will be  
44  
45 performed in accordance with the Declaration of Helsinki and the Japanese ethical guidelines  
46  
47 for clinical research. The protocol was approved by the Institutional Review Board at each  
48  
49 study site (Osaka; Kindai University Hospital, Kansai Medical University Hospital, National  
50  
51 Hospital Organization Kinki-Chuo Chest Medical Center, Sakai City Medical Center, Izumi  
52  
53 Municipal Hospital, and Sakai Hospital Kindai University Faculty of Medicine, Tokyo;  
54  
55 National Cancer Center Hospital, Chiba; National Cancer Center Hospital East, Nara; Nara  
56  
57  
58  
59  
60

1  
2  
3 Medical University Hospital, Nagoya; Nagoya University Hospital, Hyogo; Hyogo  
4  
5 Prefectural Amagasaki General Medical Center, Kobe University Graduate School of  
6  
7 Medicine and Hyogo Prefectural Kakogawa Medical Center, and Fukuoka; National Hospital  
8  
9 Organization Kyusyu Cancer Center). This trial has been registered at the UMIN Clinical  
10  
11 Trials Registry as UMIN000017647. Modifications in the study protocol will be  
12  
13 communicated to the Institutional Review Board at each study site as well as the Independent  
14  
15 Data Monitoring Committee. Each Ethics Committee or Institutional Review Board will  
16  
17 revise informed consent materials given to participants and adapt according to their own  
18  
19 institution's guidelines.  
20  
21  
22  
23  
24

## 25 Discussion

26  
27 To our knowledge, there has been no randomised study of the analgesic efficacy of  
28  
29 duloxetine in patients with neuropathic cancer pain refractory to opioids and gabapentinoids.  
30  
31 In our planned trial, we will use a randomised, double-blind, placebo-controlled design,  
32  
33 which is the most appropriate design to demonstrate the efficacy of a new therapy. Our  
34  
35 findings using this approach may also allow international recommendations to be updated.  
36  
37 We also considered a crossover design, but a parallel design was finally chosen, given that  
38  
39 the crossover design has several limitations [35]. The crossover design is suitable for patients  
40  
41 in a stable condition, but this is not the situation for cancer patients with neuropathic pain  
42  
43 (NP) refractory to opioids and gabapentinoids. We also believe that the treatment might have  
44  
45 carryover effects and alter the response to subsequent treatments, and that patients may not be  
46  
47 in a comparable condition at the start of each treatment period in a crossover trial.  
48  
49  
50

51  
52 Several issues related to the content of the trial require discussion. There are three major  
53  
54 concerns: (i) the heterogeneity of causes of NP, (ii) the choice of the primary endpoint, and  
55  
56 (iii) the role of depression. To address the heterogeneous causes of NP, we excluded patients  
57  
58  
59  
60

1  
2  
3 with CIPN, but the trial might still be criticized due to combination of peripheral and central  
4 NP in one study. Narrower criteria are theoretically possible, but accrual of patients who meet  
5 these criteria is likely to be difficult. We thus decided to include both peripheral and central  
6 NP in the study, and subgroup analyses will be performed. Second, the primary endpoint is  
7 the difference in average pain intensity score at T3 (day 10) between two groups. Although  
8 we had acknowledged that some authors recommend worst pain intensity in the last 24 hours  
9 as primary end-points because it satisfies most key recommendations in the draft guidance by  
10 the FDA [36], average pain intensity is adopted by many clinical trials about NP [37],  
11 including only one placebo-controlled RCT in cancer patients with NP [14]. Furthermore, to  
12 evaluate chronic pain, especially taking into account the nature of NP in this setting, we  
13 concluded that it is better to use the “average pain intensity in the last 24 hours” as the  
14 primary endpoint after discussion among the members of the steering committee. Finally,  
15 since depression affects the assessment of pain, we excluded patients with depression from  
16 the study population for accurate evaluation of the pharmacological effects of duloxetine on  
17 pain. Therefore, the planned placebo-controlled double-blind multicentre RCT will be the  
18 first to evaluate the efficacy of pharmacological treatment on well-defined NP in patients  
19 with cancer.  
20  
21  
22  
23  
24  
25  
26  
27  
28  
29  
30  
31  
32  
33  
34  
35  
36  
37  
38  
39  
40  
41  
42

### **Trial status**

43  
44  
45 The enrollment started in July 2015. At the time of manuscript submission (June 2017),  
46 two thirds of patients have participated. We thus expect to complete the recruitment by  
47 December 2017.  
48  
49  
50  
51  
52  
53

### **Confidentially**

54  
55  
56 Data will be retained in accordance with the Japanese ethical guidelines for clinical research.  
57  
58  
59  
60

1  
2  
3 Participants will be allocated a unique identification (ID) number at entry. The master list  
4 linking participant personal information and ID number will be maintained in a separate  
5 locked cabinet and password-protected hard drive at each institution. Data will be analysed by  
6 ID number only. Records will be retained for 5 years after study completion and then  
7 destroyed by the data center.  
8  
9  
10  
11  
12

### **Dissemination**

13  
14  
15  
16  
17 The results of this study will be submitted for publication in international peer-reviewed  
18 journals and the key findings presented at conferences. Participants will be informed of the  
19 results of the trial by the investigators. Authorship will be ascribed in accordance with the  
20 International Committee of Medical Journal Editors guidance.  
21  
22  
23  
24  
25  
26  
27

### **Data Sharing Statement**

28  
29  
30 The data obtained in this study can only be accessed if approved by Japanese Organisation for  
31 Research and Treatment of Cancer (JORTC) Protocol Review Committee or Independent  
32 Data Monitoring Committee.  
33  
34  
35  
36  
37  
38  
39

### **Access to data**

40  
41  
42 JORTC Data Center and JORTC Independent Data Monitoring Committee have access to the  
43 final trial dataset. There is no contractual agreement regarding investigators' access  
44 restrictions on dataset.  
45  
46  
47  
48  
49

### **Declarations**

50  
51  
52 Ethics approval and consent to participate

53  
54  
55  
56 The protocol was approved by the Institutional Review Board at each study site. Informed  
57  
58  
59  
60

1  
2  
3 consent for participation in the trial will be obtained from all patients.  
4  
5

6  
7 **Competing interests**  
8

9 The authors declare that they have no competing interests.  
10  
11

12  
13 **Funding**  
14

15 This work was supported by the following grants: Sasakawa Memorial Health Foundation  
16 Research Grant (Grant No.: 2013-A003), 2014-2016 Grant-in-Aid for Scientific Research  
17 (Grant-in-Aid for Young Scientists B; Grant No.: 26860486), 2014 Health Labour Sciences  
18 Research Grant (Grant for Innovative Clinical Cancer Research: Multicenter Clinical  
19 Research Concerning the Development of Palliative Medicine for Severe Symptoms in  
20 Cancer Patients) Research Team (H26-Innovative Cancer-General-056), and a 2015-2017  
21 Japan Agency for Medical Research and Development (AMED) award (Innovative Clinical  
22 Cancer Research). The entire research organization has no conflicts of interest to declare.  
23  
24  
25  
26  
27  
28  
29  
30  
31  
32  
33  
34  
35

36 **Sponsor detail**  
37

38 Division of Cancer Research Department of Research Promotion  
39

40 Japan Agency for Medical Research and Development  
41

42 22F Yomiuri Shimbun Bldg. 1-7-1 Otemachi, Chiyoda-ku, Tokyo 100-0004 Japan  
43

44 Phone: +81-3-6870-2221  
45

46 Fax: +81-3-6870-2244  
47  
48  
49  
50

51 **Abbreviations**  
52

53 NRS: Numerical Rating Scale; NP: Neuropathic pain; TCA: Tricyclic Antidepressant;  
54  
55 NCCN: National Comprehensive Cancer Network; CIPN: Chemotherapy-Induced Peripheral  
56  
57  
58  
59  
60



1  
2  
3 Neuropathy; IASP: International Association for the Study of Pain; HADS: Hospital Anxiety  
4 and Depression Scale; PS: Performance Status; PRS: Pain Relief Scale; ECOG: European  
5 Cooperative Oncology Group; SF-MPQ: Short-Form McGill Pain Questionnaire; EORTC:  
6 European Organization for Research and Treatment; CTCAE: Common Terminology Criteria  
7 for Adverse Events; JCOG: Japan Clinical Oncology Group; PCS: Pain Catastrophizing  
8 Scale; NSAIDs: Non-Steroidal Anti-Inflammatory Drugs; NMDA: N-methyl-D-aspartate;  
9 JORTC: Japanese Organization for Research and Treatment of Cancer  
10  
11  
12  
13  
14  
15  
16  
17  
18  
19

#### 20 Authors' contributions

21  
22 HM, HI, SI, AK, YK, TM, YM, TM, KA, participated in the design of the study.  
23  
24 TY, TK, designed the statistical analysis plan. All authors contributed to writing and revising  
25  
26 the manuscript critically, and all gave their final approval of the version to be published.  
27  
28  
29

#### 30 Acknowledgements

31  
32 We are grateful for support from the Japan Agency for Medical Research and  
33  
34 Development, Grant-in-Aid for Scientific Research, and the Sasakawa Memorial Health  
35  
36 Foundation. The authors thank in advance all the patients, investigators and institutions  
37  
38 involved in this study.  
39  
40  
41  
42  
43  
44  
45  
46  
47  
48  
49  
50  
51  
52  
53  
54  
55  
56  
57  
58  
59  
60

## References

1. Portenoy RK, Miransky J, Thaler HT, Hornung J, Bianchi C, Cibas-Kong I, et al. Pain in ambulatory patients with lung or colon cancer. Prevalence, characteristics, and effect. *Cancer*. 1992;70:1616-24.
2. Garcia de Paredes ML, del Moral Gonzalez F, Martinez del Prado P, Martí Ciriquián JL, Enrech Francés S, Cobo Dols M, et al. First evidence of oncologic neuropathic pain prevalence after screening 8615 cancer patients. Results of the On study. *Ann Oncol*. 2011;22:924-30.
3. Fainsinger RL, Fairchild A, Nekolaichuk C, Lawlor P, Lowe S, Hanson J. Is pain intensity a predictor of the complexity of cancer pain management? *J Clin Oncol*. 2009;27:585-90.
4. Bennett MI, Rayment C, Hjermstad M, Aass N, Caraceni A, Kaasa S. Prevalence and aetiology of neuropathic pain in cancer patients: a systematic review. *Pain*. 2012;153:359-65.
5. Caraceni A, Hanks G, Kaasa S, Bennett MI, Brunelli C, Chemy N, et al. Use of opioid analgesics in the treatment of cancer pain: evidence-based recommendations from the EAPC. *Lancet Oncol*. 2012;13:e58-68.
6. O'Connor AB, Dworkin RH. Treatment of neuropathic pain: an overview of recent guidelines. *Am J Med*. 2009;122:S22-32.
7. Saarto T, Wiffen PJ. Antidepressants for neuropathic pain. *Cochrane Database Syst Rev*. 2007;17:CD005454.
8. The National Comprehensive Cancer Network.  
<http://www.oralcancerfoundation.org/treatment/pdf/pain.pdf>
9. Dworkin RH, O'Connor AB, Backonja M, Farrar JT, Finnerup NB, Jensen TS, et al. Pharmacologic management of neuropathic pain: Evidence-based recommendations. *Pain*. 2007;132:237-51.

- 1  
2  
3 10. Tan T, Barry P, Reken S, Baker M; Guideline Development Group. Pharmacological  
4 management of neuropathic pain in non-specialist settings: summary of NICE guidance.  
5  
6 BMJ. 2010;340:c1079.  
7  
8
- 9  
10 11. Attal N, Cruccu G, Baron R, Haanpää M, Hansson P, Jensen TS et al. EFNS guidelines on  
11 the pharmacological treatment of neuropathic pain: 2010 revision. Eur J Neurol.  
12  
13 2010;17:1113-e88.  
14  
15
- 16 12. Finnerup NB, Attal N, Haroutounian S, McNicol E, Baron R, Dworkin RH, et al.  
17  
18 Pharmacotherapy for neuropathic pain in adults: a systematic review and meta-analysis.  
19  
20 Lancet Neurol. 2015;14:162-73.  
21  
22
- 23 13. Perry G, Andrew N, Scott M, Russell K. Nonopioid pharmacotherapy. In: Perry G, editor.  
24  
25 The Diagnosis and Treatment of Breakthrough Pain. New York: Oxford University Press;  
26  
27 2008. p. 86-90.  
28  
29
- 30 14. Caraceni A, Zecca E, Bonezzi C, Arcuri E, Yaya Tur R, Maltoni M, et al. Gabapentin for  
31  
32 neuropathic cancer pain: a randomized controlled trial from the Gabapentin Cancer Pain  
33  
34 Study Group. J Clin Oncol. 2004;22:2909-17.  
35  
36
- 37 15. Bouhassira D, Wilhelm S, Schacht A, Perrot S, Kosek E, Cruccu G, et al. Neuropathic  
38  
39 pain phenotyping as a predictor of treatment response in painful diabetic neuropathy: data  
40  
41 from the randomized, double-blind, COMBO-DN study. Pain. 2014;155:2171-9.  
42  
43
- 44 16. Smith EM, Pang H, Cirrincione C, Fleishman S, Paskett ED, Ahles T, et al. Effect of  
45  
46 duloxetine on pain, function, and quality of life among patients with  
47  
48 chemotherapy-induced painful peripheral neuropathy: a randomized clinical trial. JAMA.  
49  
50 2013;309:1359-67.  
51  
52
- 53 17. Matsuoka H, Makimura C, Koyama A, Otsuka M, Okamoto W, Fujisaka Y, et al. Pilot  
54  
55 study of duloxetine for cancer patients with neuropathic pain non-responsive to pregabalin.  
56  
57 Anticancer Res. 2012;32:1805-10.  
58  
59  
60

- 1  
2  
3 18. Schukro RP, Oehmke MJ, Geroldinger A, Heinze G, Kress HG, Pramhas S. Efficacy of  
4  
5 Duloxetine in Chronic Low Back Pain with a Neuropathic Component: A Randomized,  
6  
7 Double-blind, Placebo-controlled Crossover Trial. *Anesthesiology*. 2016;124:150-8.  
8
- 9  
10 19. Tesfaye S, Wilhelm S, Lledo A, Schacht A, Tölle T, Bouhassira D, et al. Duloxetine and  
11  
12 pregabalin: high-dose monotherapy or their combination? The “COMBO-DN study” –a  
13  
14 multinational, randomized, double-blind, parallel-group study in patients with diabetic  
15  
16 neuropathic pain. *Pain*. 2013;154:2616-25.  
17
- 18  
19 20. Pickering G, Marcoux M, Chapiro S, David L, Rat P, Michel M, et al. An Algorithm for  
20  
21 Neuropathic Pain Management in Older People. *Drugs and Aging*. 2016;33:575-83.  
22
- 23  
24 21. Treede RD1, Jensen TS, Campbell JN, Cruccu G, Dostrovsky JO, Griffin JW, et al.  
25  
26 Neuropathic pain: redefinition and a grading system for clinical and research purposes.  
27  
28 *Neurology*. 2008;70:1630-5.
- 29  
30 22. Atkinson TM, Mendoza TR, Sit L, Passik S, Scher HI, Cleeland C, et al. The brief pain  
31  
32 inventory and its “pain at its worst in the last 24 hours” item: clinical trial endpoint  
33  
34 considerations. *Pain Med*. 2010;11:337-46.  
35
- 36  
37 23. Rao RD, Michalak JC, Sloan JA, Loprinzi CL, Soori GS, Nikcevich DA, et al. Efficacy of  
38  
39 gabapentin in the management of chemotherapy-induced peripheral neuropathy; a phase 3  
40  
41 randomized, double-blind, placebo-controlled, crossover trial (N00C3). *Cancer*.  
42  
43 2007;110:2110-8.  
44
- 45  
46 24. Caraceni A, Cherny N, Fainsinger R, Kaasa S, Poulain P, Radbruch L, et al. Pain  
47  
48 measurement tools and methods in clinical research in palliative care: recommendations  
49  
50 of an Expert Working Group of the European Association of Palliative Care. *J Pain*  
51  
52 *Symptom Manage*. 2002;23:239-55.  
53
- 54  
55 25. Maruo T, Nakae A, Maeda L, Shi K, Takahashi K, Morris S, et al. Validity, reliability,  
56  
57 and assessment sensitivity of the Japanese version of the short-form McGill pain  
58  
59  
60

- 1  
2  
3 questionnaire 2 in Japanese patients with neuropathic and non-neuropathic pain. *Pain Med.*  
4  
5 2014;15:1930-7.  
6  
7  
8 26. Miyazaki K1, Suzukamo Y, Shimozuma K, Nakayama T. Verification of the  
9  
10 psychometric properties of the Japanese version of the European Organization for  
11  
12 Research and Treatment of Cancer Quality of Life Questionnaire Core 15 palliative  
13  
14 (EORTCQLQ-C15-PAL). *Qual Life Res.* 2012;21:335-40.  
15  
16  
17 27. Zigmond AS, Snaith RP. The hospital anxiety and depression scale. *Acta Psychiatr Scand.*  
18  
19 1983;67:361-70.  
20  
21  
22 28. Kugaya A, Akechi T, Okuyama T, Okamura H, Uchitomi Y. Screening for psychological  
23  
24 distress in Japanese cancer patients. *Jpn J Clin Oncol.* 1998;28:333-8.  
25  
26  
27 29. Utne I, Miaskowski C, Bjordal K, Paul SM, Jakobsen G, Rustøen T. Differences in the  
28  
29 use of pain coping strategies between oncology inpatients with mild vs. moderate to severe  
30  
31 pain. *J Pain Symptom Manage.* 2009;38:717-26.  
32  
33  
34 30. Matsuoka H, Sakano Y. Assessment of cognitive aspect of pain: Development, reliability,  
35  
36 and validation of Japanese version of pain catastrophizing scale. *Jpn J Psychosoma Med.*  
37  
38 2007;47:95-102.  
39  
40  
41 31. Oken MM, Creech RH, Tormey DC, Horton J, Davis TE, McFadden ET, et al. Toxicity  
42  
43 and response criteria of the Eastern Cooperative Oncology Group. *Am J Clin Oncol.*  
44  
45 1982;5:649-55.  
46  
47  
48 32. Toth C. Substitution of gabapentin therapy with pregabalin therapy in neuropathic pain  
49  
50 due to peripheral neuropathy. *Pain Med.* 2010;11:456-65.  
51  
52  
53 33. Quilici S, Chancellor J, Löthgren M, Simon D, Said G, Le TK et al. Meta-analysis of  
54  
55 duloxetine vs. pregabalin and gabapentin in the treatment of diabetic peripheral  
56  
57 neuropathic pain. *BMC neurology.* 2009;9:6.  
58  
59  
60

- 1  
2  
3 34. Hui D, Shamieh O, Paiva CE, Perez-Cruz PE, Kwon JH, Muckaden MA et al. Minimal  
4 clinically important differences in the Edmonton Symptom Assessment Scale in cancer  
5 patients: A prospective, multicenter study. *Cancer*. 2015;121:3027-35.  
6  
7  
8  
9  
10 35. Senn SS. *Cross-Over Trials in Clinical Research*. John Wiley & Sons: Chichester; 2002.  
11  
12 36. Atkinson TM, Mendoza TR, Sit L, Passik S, Scher HI, Cleeland C et al. The Brief Pain  
13 Inventory and its "pain at its worst in the last 24 hours" item: clinical trial endpoint  
14 considerations. *Pain Med*. 2010;11:337-46.  
15  
16  
17  
18 37. McNicol ED, Midbari A, Eisenberg E. Opioids for neuropathic pain. *Cochrane Database*  
19 *Syst Rev*. 2013;29:8 CD006146.  
20  
21  
22  
23  
24  
25  
26  
27  
28  
29  
30  
31  
32  
33  
34  
35  
36  
37  
38  
39  
40  
41  
42  
43  
44  
45  
46  
47  
48  
49  
50  
51  
52  
53  
54  
55  
56  
57  
58  
59  
60

review only

**Figure Legends**

Figure 1. Flow chart of the procedures in the study. Participants will be randomized (1:1 allocation ratio) into the duloxetine intervention group or the placebo control group.

Evaluations will be made at baseline (T0 randomization), and on day 0 (T1), day 3 (T2), and day 10 (T3).

For peer review only

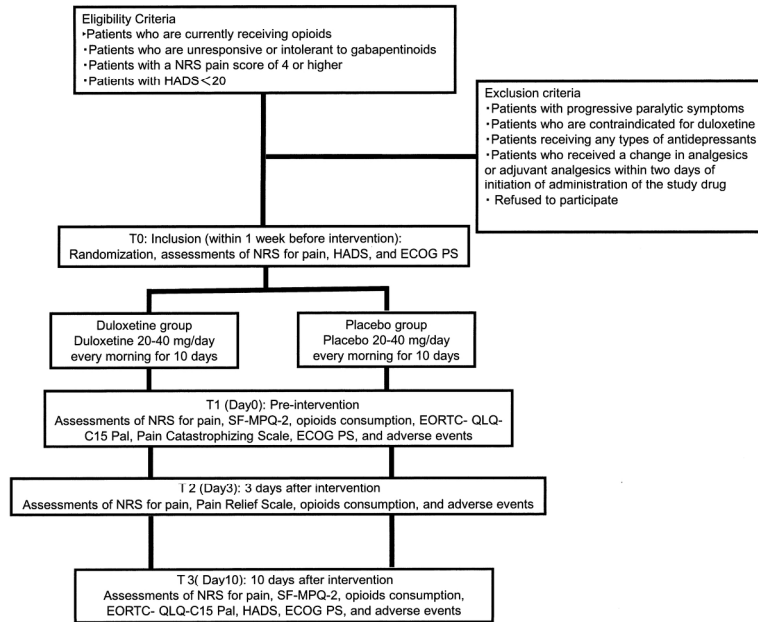

Fig.1. Flow chart of the procedures in the study

210x148mm (300 x 300 DPI)

ew only



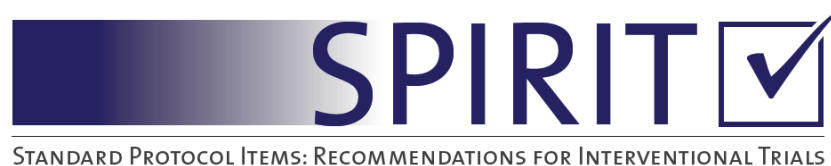

STANDARD PROTOCOL ITEMS: RECOMMENDATIONS FOR INTERVENTIONAL TRIALS

SPIRIT 2013 Checklist: Recommended items to address in a clinical trial protocol and related documents\*

| Section/item                      | Item No | Description                                                                                                                                                                                                                                                                              | Addressed on page number |
|-----------------------------------|---------|------------------------------------------------------------------------------------------------------------------------------------------------------------------------------------------------------------------------------------------------------------------------------------------|--------------------------|
| <b>Administrative information</b> |         |                                                                                                                                                                                                                                                                                          |                          |
| Title                             | 1       | Descriptive title identifying the study design, population, interventions, and, if applicable, trial acronym                                                                                                                                                                             | 1                        |
| Trial registration                | 2a      | Trial identifier and registry name. If not yet registered, name of intended registry                                                                                                                                                                                                     | 4                        |
|                                   | 2b      | All items from the World Health Organization Trial Registration Data Set                                                                                                                                                                                                                 | ✘ 1                      |
| Protocol version                  | 3       | Date and version identifier                                                                                                                                                                                                                                                              | 4                        |
| Funding                           | 4       | Sources and types of financial, material, and other support                                                                                                                                                                                                                              | 18                       |
| Roles and responsibilities        | 5a      | Names, affiliations, and roles of protocol contributors                                                                                                                                                                                                                                  | 18                       |
|                                   | 5b      | Name and contact information for the trial sponsor                                                                                                                                                                                                                                       | 18                       |
|                                   | 5c      | Role of study sponsor and funders, if any, in study design; collection, management, analysis, and interpretation of data; writing of the report; and the decision to submit the report for publication, including whether they will have ultimate authority over any of these activities | Not applicable           |
|                                   | 5d      | Composition, roles, and responsibilities of the coordinating centre, steering committee, endpoint adjudication committee, data management team, and other individuals or groups overseeing the trial, if applicable (see Item 21a for data monitoring committee)                         | ✘ 1                      |

**Introduction**

|    |                                                           |     |                                                                                                               |           |
|----|-----------------------------------------------------------|-----|---------------------------------------------------------------------------------------------------------------|-----------|
| 1  | Background and                                            | 6a  | Description of research question and justification for undertaking the trial, including summary of relevant   | 6         |
| 2  | rationale                                                 |     | studies (published and unpublished) examining benefits and harms for each intervention                        |           |
| 3  |                                                           |     |                                                                                                               |           |
| 4  |                                                           | 6b  | Explanation for choice of comparators                                                                         | 13        |
| 5  |                                                           |     |                                                                                                               |           |
| 6  | Objectives                                                | 7   | Specific objectives or hypotheses                                                                             | 6         |
| 7  |                                                           |     |                                                                                                               |           |
| 8  | Trial design                                              | 8   | Description of trial design including type of trial (eg, parallel group, crossover, factorial, single group), |           |
| 9  |                                                           |     | allocation ratio, and framework (eg, superiority, equivalence, noninferiority, exploratory)                   | 6         |
| 10 |                                                           |     |                                                                                                               |           |
| 11 |                                                           |     |                                                                                                               |           |
| 12 | <b>Methods: Participants, interventions, and outcomes</b> |     |                                                                                                               |           |
| 13 |                                                           |     |                                                                                                               |           |
| 14 | Study setting                                             | 9   | Description of study settings (eg, community clinic, academic hospital) and list of countries where data will | 7         |
| 15 |                                                           |     | be collected. Reference to where list of study sites can be obtained                                          |           |
| 16 |                                                           |     |                                                                                                               |           |
| 17 | Eligibility criteria                                      | 10  | Inclusion and exclusion criteria for participants. If applicable, eligibility criteria for study centres and  | 7, Box1   |
| 18 |                                                           |     | individuals who will perform the interventions (eg, surgeons, psychotherapists)                               |           |
| 19 |                                                           |     |                                                                                                               |           |
| 20 | Interventions                                             | 11a | Interventions for each group with sufficient detail to allow replication, including how and when they will be | 12-13     |
| 21 |                                                           |     | administered                                                                                                  |           |
| 22 |                                                           |     |                                                                                                               |           |
| 23 |                                                           | 11b | Criteria for discontinuing or modifying allocated interventions for a given trial participant (eg, drug dose  | 12-13     |
| 24 |                                                           |     | change in response to harms, participant request, or improving/worsening disease)                             |           |
| 25 |                                                           |     |                                                                                                               |           |
| 26 |                                                           | 11c | Strategies to improve adherence to intervention protocols, and any procedures for monitoring adherence        | 12-13     |
| 27 |                                                           |     | (eg, drug tablet return, laboratory tests)                                                                    |           |
| 28 |                                                           |     |                                                                                                               |           |
| 29 |                                                           | 11d | Relevant concomitant care and interventions that are permitted or prohibited during the trial                 | 13        |
| 30 |                                                           |     |                                                                                                               |           |
| 31 | Outcomes                                                  | 12  | Primary, secondary, and other outcomes, including the specific measurement variable (eg, systolic blood       | 13-14     |
| 32 |                                                           |     | pressure), analysis metric (eg, change from baseline, final value, time to event), method of aggregation (eg, |           |
| 33 |                                                           |     | median, proportion), and time point for each outcome. Explanation of the clinical relevance of chosen         |           |
| 34 |                                                           |     | efficacy and harm outcomes is strongly recommended                                                            |           |
| 35 |                                                           |     |                                                                                                               |           |
| 36 |                                                           |     |                                                                                                               |           |
| 37 |                                                           |     |                                                                                                               |           |
| 38 | Participant timeline                                      | 13  | Time schedule of enrolment, interventions (including any run-ins and washouts), assessments, and visits for   | 9, Table1 |
| 39 |                                                           |     | participants. A schematic diagram is highly recommended (see Figure)                                          |           |
| 40 |                                                           |     |                                                                                                               |           |
| 41 |                                                           |     |                                                                                                               |           |
| 42 |                                                           |     |                                                                                                               |           |
| 43 |                                                           |     |                                                                                                               |           |
| 44 |                                                           |     |                                                                                                               |           |
| 45 |                                                           |     |                                                                                                               |           |
| 46 |                                                           |     |                                                                                                               |           |
| 47 |                                                           |     |                                                                                                               |           |

|    |                                                                     |     |                                                                                                                                                                                                                                                                                                                                                                                                              |       |
|----|---------------------------------------------------------------------|-----|--------------------------------------------------------------------------------------------------------------------------------------------------------------------------------------------------------------------------------------------------------------------------------------------------------------------------------------------------------------------------------------------------------------|-------|
| 1  | Sample size                                                         | 14  | Estimated number of participants needed to achieve study objectives and how it was determined, including clinical and statistical assumptions supporting any sample size calculations                                                                                                                                                                                                                        | 14-15 |
| 2  |                                                                     |     |                                                                                                                                                                                                                                                                                                                                                                                                              |       |
| 3  |                                                                     |     |                                                                                                                                                                                                                                                                                                                                                                                                              |       |
| 4  | Recruitment                                                         | 15  | Strategies for achieving adequate participant enrolment to reach target sample size                                                                                                                                                                                                                                                                                                                          | 8,9   |
| 5  |                                                                     |     |                                                                                                                                                                                                                                                                                                                                                                                                              |       |
| 6  |                                                                     |     |                                                                                                                                                                                                                                                                                                                                                                                                              |       |
| 7  | <b>Methods: Assignment of interventions (for controlled trials)</b> |     |                                                                                                                                                                                                                                                                                                                                                                                                              |       |
| 8  |                                                                     |     |                                                                                                                                                                                                                                                                                                                                                                                                              |       |
| 9  | Allocation:                                                         |     |                                                                                                                                                                                                                                                                                                                                                                                                              |       |
| 10 |                                                                     |     |                                                                                                                                                                                                                                                                                                                                                                                                              |       |
| 11 | Sequence                                                            | 16a | Method of generating the allocation sequence (eg, computer-generated random numbers), and list of any factors for stratification. To reduce predictability of a random sequence, details of any planned restriction (eg, blocking) should be provided in a separate document that is unavailable to those who enrol participants or assign interventions                                                     | 8     |
| 12 | generation                                                          |     |                                                                                                                                                                                                                                                                                                                                                                                                              |       |
| 13 |                                                                     |     |                                                                                                                                                                                                                                                                                                                                                                                                              |       |
| 14 |                                                                     |     |                                                                                                                                                                                                                                                                                                                                                                                                              |       |
| 15 |                                                                     |     |                                                                                                                                                                                                                                                                                                                                                                                                              |       |
| 16 | Allocation                                                          | 16b | Mechanism of implementing the allocation sequence (eg, central telephone; sequentially numbered, opaque, sealed envelopes), describing any steps to conceal the sequence until interventions are assigned                                                                                                                                                                                                    | 8     |
| 17 | concealment                                                         |     |                                                                                                                                                                                                                                                                                                                                                                                                              |       |
| 18 | mechanism                                                           |     |                                                                                                                                                                                                                                                                                                                                                                                                              |       |
| 19 |                                                                     |     |                                                                                                                                                                                                                                                                                                                                                                                                              |       |
| 20 |                                                                     |     |                                                                                                                                                                                                                                                                                                                                                                                                              |       |
| 21 | Implementation                                                      | 16c | Who will generate the allocation sequence, who will enrol participants, and who will assign participants to interventions                                                                                                                                                                                                                                                                                    | 8     |
| 22 |                                                                     |     |                                                                                                                                                                                                                                                                                                                                                                                                              |       |
| 23 |                                                                     |     |                                                                                                                                                                                                                                                                                                                                                                                                              |       |
| 24 | Blinding (masking)                                                  | 17a | Who will be blinded after assignment to interventions (eg, trial participants, care providers, outcome assessors, data analysts), and how                                                                                                                                                                                                                                                                    | 8-9   |
| 25 |                                                                     |     |                                                                                                                                                                                                                                                                                                                                                                                                              |       |
| 26 |                                                                     |     |                                                                                                                                                                                                                                                                                                                                                                                                              |       |
| 27 |                                                                     |     |                                                                                                                                                                                                                                                                                                                                                                                                              |       |
| 28 |                                                                     | 17b | If blinded, circumstances under which unblinding is permissible, and procedure for revealing a participant's allocated intervention during the trial                                                                                                                                                                                                                                                         | 8-9   |
| 29 |                                                                     |     |                                                                                                                                                                                                                                                                                                                                                                                                              |       |
| 30 |                                                                     |     |                                                                                                                                                                                                                                                                                                                                                                                                              |       |
| 31 |                                                                     |     |                                                                                                                                                                                                                                                                                                                                                                                                              |       |
| 32 | <b>Methods: Data collection, management, and analysis</b>           |     |                                                                                                                                                                                                                                                                                                                                                                                                              |       |
| 33 |                                                                     |     |                                                                                                                                                                                                                                                                                                                                                                                                              |       |
| 34 | Data collection                                                     | 18a | Plans for assessment and collection of outcome, baseline, and other trial data, including any related processes to promote data quality (eg, duplicate measurements, training of assessors) and a description of study instruments (eg, questionnaires, laboratory tests) along with their reliability and validity, if known. Reference to where data collection forms can be found, if not in the protocol | 10    |
| 35 | methods                                                             |     |                                                                                                                                                                                                                                                                                                                                                                                                              |       |
| 36 |                                                                     |     |                                                                                                                                                                                                                                                                                                                                                                                                              |       |
| 37 |                                                                     |     |                                                                                                                                                                                                                                                                                                                                                                                                              |       |
| 38 |                                                                     |     |                                                                                                                                                                                                                                                                                                                                                                                                              |       |
| 39 |                                                                     |     |                                                                                                                                                                                                                                                                                                                                                                                                              |       |
| 40 |                                                                     | 18b | Plans to promote participant retention and complete follow-up, including list of any outcome data to be collected for participants who discontinue or deviate from intervention protocols                                                                                                                                                                                                                    | 13    |
| 41 |                                                                     |     |                                                                                                                                                                                                                                                                                                                                                                                                              |       |
| 42 |                                                                     |     |                                                                                                                                                                                                                                                                                                                                                                                                              |       |
| 43 |                                                                     |     |                                                                                                                                                                                                                                                                                                                                                                                                              |       |
| 44 |                                                                     |     |                                                                                                                                                                                                                                                                                                                                                                                                              |       |
| 45 |                                                                     |     |                                                                                                                                                                                                                                                                                                                                                                                                              |       |
| 46 |                                                                     |     |                                                                                                                                                                                                                                                                                                                                                                                                              |       |
| 47 |                                                                     |     |                                                                                                                                                                                                                                                                                                                                                                                                              |       |

|    |                                 |     |                                                                                                                                                                                                                                                                                                                                       |     |
|----|---------------------------------|-----|---------------------------------------------------------------------------------------------------------------------------------------------------------------------------------------------------------------------------------------------------------------------------------------------------------------------------------------|-----|
| 1  | Data management                 | 19  | Plans for data entry, coding, security, and storage, including any related processes to promote data quality (eg, double data entry; range checks for data values). Reference to where details of data management procedures can be found, if not in the protocol                                                                     | ※ 2 |
| 2  |                                 |     |                                                                                                                                                                                                                                                                                                                                       |     |
| 3  |                                 |     |                                                                                                                                                                                                                                                                                                                                       |     |
| 4  |                                 |     |                                                                                                                                                                                                                                                                                                                                       |     |
| 5  | Statistical methods             | 20a | Statistical methods for analysing primary and secondary outcomes. Reference to where other details of the statistical analysis plan can be found, if not in the protocol                                                                                                                                                              | 14  |
| 6  |                                 |     |                                                                                                                                                                                                                                                                                                                                       |     |
| 7  |                                 |     |                                                                                                                                                                                                                                                                                                                                       |     |
| 8  |                                 | 20b | Methods for any additional analyses (eg, subgroup and adjusted analyses)                                                                                                                                                                                                                                                              | 14  |
| 9  |                                 |     |                                                                                                                                                                                                                                                                                                                                       |     |
| 10 |                                 | 20c | Definition of analysis population relating to protocol non-adherence (eg, as randomised analysis), and any statistical methods to handle missing data (eg, multiple imputation)                                                                                                                                                       | ※ 3 |
| 11 |                                 |     |                                                                                                                                                                                                                                                                                                                                       |     |
| 12 |                                 |     |                                                                                                                                                                                                                                                                                                                                       |     |
| 13 |                                 |     |                                                                                                                                                                                                                                                                                                                                       |     |
| 14 |                                 |     |                                                                                                                                                                                                                                                                                                                                       |     |
| 15 | <b>Methods: Monitoring</b>      |     |                                                                                                                                                                                                                                                                                                                                       |     |
| 16 |                                 |     |                                                                                                                                                                                                                                                                                                                                       |     |
| 17 | Data monitoring                 | 21a | Composition of data monitoring committee (DMC); summary of its role and reporting structure; statement of whether it is independent from the sponsor and competing interests; and reference to where further details about its charter can be found, if not in the protocol. Alternatively, an explanation of why a DMC is not needed | ※ 1 |
| 18 |                                 |     |                                                                                                                                                                                                                                                                                                                                       |     |
| 19 |                                 |     |                                                                                                                                                                                                                                                                                                                                       |     |
| 20 |                                 |     |                                                                                                                                                                                                                                                                                                                                       |     |
| 21 |                                 |     |                                                                                                                                                                                                                                                                                                                                       |     |
| 22 |                                 | 21b | Description of any interim analyses and stopping guidelines, including who will have access to these interim results and make the final decision to terminate the trial                                                                                                                                                               | 9   |
| 23 |                                 |     |                                                                                                                                                                                                                                                                                                                                       |     |
| 24 |                                 |     |                                                                                                                                                                                                                                                                                                                                       |     |
| 25 |                                 |     |                                                                                                                                                                                                                                                                                                                                       |     |
| 26 | Harms                           | 22  | Plans for collecting, assessing, reporting, and managing solicited and spontaneously reported adverse events and other unintended effects of trial interventions or trial conduct                                                                                                                                                     | 10  |
| 27 |                                 |     |                                                                                                                                                                                                                                                                                                                                       |     |
| 28 |                                 |     |                                                                                                                                                                                                                                                                                                                                       |     |
| 29 | Auditing                        | 23  | Frequency and procedures for auditing trial conduct, if any, and whether the process will be independent from investigators and the sponsor                                                                                                                                                                                           | 9   |
| 30 |                                 |     |                                                                                                                                                                                                                                                                                                                                       |     |
| 31 |                                 |     |                                                                                                                                                                                                                                                                                                                                       |     |
| 32 |                                 |     |                                                                                                                                                                                                                                                                                                                                       |     |
| 33 | <b>Ethics and dissemination</b> |     |                                                                                                                                                                                                                                                                                                                                       |     |
| 34 |                                 |     |                                                                                                                                                                                                                                                                                                                                       |     |
| 35 | Research ethics approval        | 24  | Plans for seeking research ethics committee/institutional review board (REC/IRB) approval                                                                                                                                                                                                                                             | 15  |
| 36 |                                 |     |                                                                                                                                                                                                                                                                                                                                       |     |
| 37 |                                 |     |                                                                                                                                                                                                                                                                                                                                       |     |
| 38 | Protocol amendments             | 25  | Plans for communicating important protocol modifications (eg, changes to eligibility criteria, outcomes, analyses) to relevant parties (eg, investigators, REC/IRBs, trial participants, trial registries, journals, regulators)                                                                                                      | 15  |
| 39 |                                 |     |                                                                                                                                                                                                                                                                                                                                       |     |
| 40 |                                 |     |                                                                                                                                                                                                                                                                                                                                       |     |
| 41 |                                 |     |                                                                                                                                                                                                                                                                                                                                       |     |
| 42 |                                 |     |                                                                                                                                                                                                                                                                                                                                       |     |
| 43 |                                 |     |                                                                                                                                                                                                                                                                                                                                       |     |
| 44 |                                 |     |                                                                                                                                                                                                                                                                                                                                       |     |
| 45 |                                 |     |                                                                                                                                                                                                                                                                                                                                       |     |
| 46 |                                 |     |                                                                                                                                                                                                                                                                                                                                       |     |
| 47 |                                 |     |                                                                                                                                                                                                                                                                                                                                       |     |

|    |                               |     |                                                                                                                                                                                                                                                                                     |                |
|----|-------------------------------|-----|-------------------------------------------------------------------------------------------------------------------------------------------------------------------------------------------------------------------------------------------------------------------------------------|----------------|
| 1  | Consent or assent             | 26a | Who will obtain informed consent or assent from potential trial participants or authorised surrogates, and how (see Item 32)                                                                                                                                                        | 8              |
| 2  |                               |     |                                                                                                                                                                                                                                                                                     |                |
| 3  |                               |     |                                                                                                                                                                                                                                                                                     |                |
| 4  |                               | 26b | Additional consent provisions for collection and use of participant data and biological specimens in ancillary studies, if applicable                                                                                                                                               | Not applicable |
| 5  |                               |     |                                                                                                                                                                                                                                                                                     |                |
| 6  |                               |     |                                                                                                                                                                                                                                                                                     |                |
| 7  | Confidentiality               | 27  | How personal information about potential and enrolled participants will be collected, shared, and maintained in order to protect confidentiality before, during, and after the trial                                                                                                | 16-17          |
| 8  |                               |     |                                                                                                                                                                                                                                                                                     |                |
| 9  |                               |     |                                                                                                                                                                                                                                                                                     |                |
| 10 | Declaration of interests      | 28  | Financial and other competing interests for principal investigators for the overall trial and each study site                                                                                                                                                                       | 17             |
| 11 |                               |     |                                                                                                                                                                                                                                                                                     |                |
| 12 |                               |     |                                                                                                                                                                                                                                                                                     |                |
| 13 |                               |     |                                                                                                                                                                                                                                                                                     |                |
| 14 | Access to data                | 29  | Statement of who will have access to the final trial dataset, and disclosure of contractual agreements that limit such access for investigators                                                                                                                                     | 17             |
| 15 |                               |     |                                                                                                                                                                                                                                                                                     |                |
| 16 |                               |     |                                                                                                                                                                                                                                                                                     |                |
| 17 | Ancillary and post-trial care | 30  | Provisions, if any, for ancillary and post-trial care, and for compensation to those who suffer harm from trial participation                                                                                                                                                       | 10             |
| 18 |                               |     |                                                                                                                                                                                                                                                                                     |                |
| 19 |                               |     |                                                                                                                                                                                                                                                                                     |                |
| 20 | Dissemination policy          | 31a | Plans for investigators and sponsor to communicate trial results to participants, healthcare professionals, the public, and other relevant groups (eg, via publication, reporting in results databases, or other data sharing arrangements), including any publication restrictions | ※ 4            |
| 21 |                               |     |                                                                                                                                                                                                                                                                                     |                |
| 22 |                               |     |                                                                                                                                                                                                                                                                                     |                |
| 23 |                               |     |                                                                                                                                                                                                                                                                                     |                |
| 24 |                               |     |                                                                                                                                                                                                                                                                                     |                |
| 25 |                               | 31b | Authorship eligibility guidelines and any intended use of professional writers                                                                                                                                                                                                      | 17             |
| 26 |                               |     |                                                                                                                                                                                                                                                                                     |                |
| 27 |                               | 31c | Plans, if any, for granting public access to the full protocol, participant-level dataset, and statistical code                                                                                                                                                                     | Not planned    |
| 28 |                               |     |                                                                                                                                                                                                                                                                                     |                |
| 29 |                               |     |                                                                                                                                                                                                                                                                                     |                |
| 30 | <b>Appendices</b>             |     |                                                                                                                                                                                                                                                                                     |                |
| 31 |                               |     |                                                                                                                                                                                                                                                                                     |                |
| 32 | Informed consent materials    | 32  | Model consent form and other related documentation given to participants and authorised surrogates                                                                                                                                                                                  | 15             |
| 33 |                               |     |                                                                                                                                                                                                                                                                                     |                |
| 34 |                               |     |                                                                                                                                                                                                                                                                                     |                |
| 35 | Biological specimens          | 33  | Plans for collection, laboratory evaluation, and storage of biological specimens for genetic or molecular analysis in the current trial and for future use in ancillary studies, if applicable                                                                                      | Not applicable |
| 36 |                               |     |                                                                                                                                                                                                                                                                                     |                |
| 37 |                               |     |                                                                                                                                                                                                                                                                                     |                |

38 \*It is strongly recommended that this checklist be read in conjunction with the SPIRIT 2013 Explanation & Elaboration for important clarification on the items.  
 39 Amendments to the protocol should be tracked and dated. The SPIRIT checklist is copyrighted by the SPIRIT Group under the Creative Commons  
 40 “[Attribution-NonCommercial-NoDerivs 3.0 Unported](http://creativecommons.org/licenses/by-nc-nd/3.0/)” license.  
 41  
 42  
 43  
 44

1 ※1 : Not stated in the protocol paper due to word limits.

2 ※2 : There is a statement in the data management plan, however not stated in the protocol paper due to word limits.

3 ※3 : There is a statement in the statistical analyses plan (definition of analysis population relating to protocol non-adherence, and any statistical methods to handle missing  
4 data) however not stated in the protocol paper due to word limits.

5 ※4 : There is a statement in the Informed consent form, however, not stated in the protocol paper due to word limits.  
6  
7  
8  
9

10  
11  
12  
13  
14  
15  
16  
17  
18  
19  
20  
21  
22  
23  
24  
25  
26  
27  
28  
29  
30  
31  
32  
33  
34  
35  
36  
37  
38  
39  
40  
41  
42  
43  
44  
45  
46  
47

For peer review only
